# Supplementary material for: Active Ga-catalysts for the ring opening homo- and copolymerization of cyclic esters, and copolymerization of epoxide and anhydrides
Source: Royal Society of Chemistry journal article supplement (doi:10.1039/d0dt02831b), 2020-01-01
Supplement: d0dt02831b1.pdf [file d0dt02831b1.pdf]

## Supporting Information

### **Active Ga-catalysts for the ring opening homo- and copolymerization of cyclic esters, and copolymerization of epoxide and anhydrides**

Swarup Ghosh,<sup>[a]</sup> Eduard Glöckler,<sup>[a]</sup> Alexander Tjaberings,<sup>[b]</sup> André H. Gröschel,<sup>[b]</sup> Christoph Wölper,<sup>[a]</sup> Stephan Schulz\*<sup>[a]</sup>

<sup>[a]</sup> Faculty of Chemistry, University of Duisburg-Essen and Center for Nanointegration Duisburg-Essen (CENIDE), Universitätsstraße 7, S07 S03 C30, 45141 Essen, Germany.

<sup>[b]</sup> Physical Chemistry, University of Münster and Center for Soft Nanoscience (SoN), Busso-Peus-Strasse 10, 48149 Münster, Germany.

## Content

### I. Spectroscopic Characterization of 1-3

**Figures S1-S3.**  $^1\text{H}$ ,  $^{13}\text{C}$  NMR, and IR spectra of **1**.

**Figures S4-S6.**  $^1\text{H}$ ,  $^{13}\text{C}$  NMR and IR spectra of **2**.

**Figures S7-S9.**  $^1\text{H}$ ,  $^{13}\text{C}$  NMR and IR spectra of **3**.

**Figures S10-S12.** DOSY NMR spectra of **1-3**.

### II. Crystallographic Details

**Table S1** Crystal data for compound **1** and **2**

### III. Polymerization Studies

**Figure S13.** Homonuclear decoupled  $^1\text{H}$ -NMR spectrum of *rac*-PLA in  $\text{CDCl}_3$  (methine H-atom region) obtained by reaction of *rac*-LA and **1** in ratio [monomer]:[Cat.]:[BnOH] = 200:1:4 at 100 °C in toluene.

**Figure S14.** Homonuclear decoupled  $^1\text{H}$ -NMR spectrum of *rac*-PLA in  $\text{CDCl}_3$  (methine H-atom region) obtained by reaction of *rac*-LA and **2** in ratio [monomer]:[Cat.]:[BnOH] = 200:1:4 at 100 °C in toluene.

**Figure S15.** Homonuclear decoupled  $^1\text{H}$ -NMR spectrum of *L*-PLA in  $\text{CDCl}_3$  (methine H-atom region) obtained by reaction of *L*-LA and **1** in ratio [monomer]:[Cat.]:[BnOH] = 200:1:4 at 100 °C in toluene.

**Figure S16.**  $^1\text{H}$ -NMR spectrum of *rac*-PLA in  $\text{CDCl}_3$  obtained by reaction of *rac*-LA and **1** in ratio [monomer]:[Cat.]:[BnOH] = 100:1:4 at 100 °C in toluene.

**Figure S17.**  $^1\text{H}$ -NMR spectrum of PCL in  $\text{CDCl}_3$  obtained by reaction of  $\epsilon$ -CL and **1** in ratio [monomer]:[Cat.]:[BnOH] = 100:1:4 at 100 °C in toluene.

**Figure S18.** MALDI-ToF spectrum of *rac*-PLA obtained by reaction of *rac*-LA and **1** in ratio [monomer]:[Cat.]:[BnOH] = 100:1:4 at 100 °C in toluene.

**Figure S19.** MALDI-ToF spectrum of PCL obtained by reaction of  $\epsilon$ -CL and **1** in ratio [monomer]:[Cat.]:[BnOH] = 100:1:4 at 100 °C in toluene.

**Figure S20.** IR spectrum of *rac*-PLA obtained by reaction of *rac*-LA and **1** in ratio [monomer]:[Cat.]:[BnOH] = 100:1:4 at 100 °C in toluene.

**Figure S21.** IR spectrum of PCL in  $\text{CDCl}_3$  obtained by reaction of  $\epsilon$ -CL and **1** in ratio [monomer]:[Cat.]:[BnOH] = 100:1:4 at 100 °C in toluene.

**Figure S22.**  $^1\text{H}$  NMR spectrum of PCL-b-PLLA copolymer in  $\text{CDCl}_3$  obtained by reaction of  $\epsilon$ -CL, *L*-LA and **1** in ratio [ $\epsilon$ -CL]:[*L*-LA]:[cat.]:[BnOH] = 200:200:1:4 at 100 °C in toluene.

**Figure S23.**  $^{13}\text{C}$  NMR spectrum of PCL-b-PLLA copolymer in  $\text{CDCl}_3$  obtained by reaction of  $\epsilon$ -CL, *L*-LA and **1** in ratio [ $\epsilon$ -CL]:[*L*-LA]:[cat.]:[BnOH] = 200:200:1:4 at 100 °C in toluene.

**Figure S24.**  $^1\text{H}$  NMR spectrum of PLLA-b-PCL copolymer in  $\text{CDCl}_3$  obtained by reaction of *L*-LA,  $\epsilon$ -CL, and **1** in ratio [*L*-LA]:[ $\epsilon$ -CL]:[cat.]:[BnOH] = 200:200:1:4 at 100 °C in toluene.

**Figure S25.**  $^{13}\text{C}$  NMR spectrum of PLLA-b-PCL copolymer in  $\text{CDCl}_3$  obtained by reaction of *L*-LA,  $\epsilon$ -CL, and **1** in ratio [*L*-LA]:[ $\epsilon$ -CL]:[cat.]:[BnOH] = 200:200:1:4 at 100 °C in toluene.

**Figure S26.**  $^1\text{H}$  NMR spectrum of poly(cyclohexenesuccinate) copolymer in  $\text{CDCl}_3$  obtained by reaction of CHO, SA, and **1** in ratio [CHO]:[SA]:[cat.]:[BnOH] = 200:200:1:4 at 100 °C in toluene.

**Figure S27.**  $^{13}\text{C}$  NMR spectrum of poly(cyclohexenesuccinate) copolymer in  $\text{CDCl}_3$  obtained by reaction of CHO, SA, and **1** in ratio [CHO]:[SA]:[cat.]:[BnOH] = 200:200:1:4 at 100 °C in toluene.

**Figure S28.**  $^1\text{H}$  NMR spectrum of poly(cyclohexene malonate) copolymer in  $\text{CDCl}_3$  obtained by reaction of CHO, SA, and **1** in ratio [CHO]:[MA]:[cat.]:[BnOH] = 200:200:1:4 at 100 °C in toluene.

**Figure S29.**  $^{13}\text{C}$  NMR spectrum of poly(cyclohexene malonate) copolymer in  $\text{CDCl}_3$  obtained by reaction of CHO, SA, and **1** in ratio [CHO]:[MA]:[cat.]:[BnOH] = 200:200:1:4 at 100 °C in toluene.

**Figure S30.** GPC elugram of *rac*-PLA obtained by reaction of *rac*-LA and **1** in ratio [monomer]:[Cat.]:[BnOH] = 200:1:4 at 100 °C in toluene.

**Figure S31.** GPC elugram of PCL obtained by reaction of  $\epsilon$ -CL and **1** in ratio [monomer]:[Cat.]:[BnOH] = 200:1:4 at 100 °C in toluene.

**Figure S32.** GPC elugram of PCL and PCL-*b*-PLLA obtained by the **1** in presence of BnOH at 100 °C in toluene.

**Figure S33.** GPC elugram of PLLA and PLLA-*b*-PCL obtained by the **1** in the presence of BnOH at 100 °C in toluene.

**Figure S34.** GPC elugram of poly(cyclohexenesuccinate) copolymer obtained by reaction of CHO, SA, and **1** in ratio [CHO]:[SA]:[cat.]:[BnOH] = 200:200:1:4 at 100 °C in toluene.

**Figure S35.** DSC curve of PCL-*b*-PLLA obtained by reaction of  $\epsilon$ -CL, *L*-LA and **1** in ratio [ $\epsilon$ -CL]:[*L*-LA]:[cat.]:[BnOH] = 200:200:1:4 at 100 °C in toluene.

**Figure S36.** DOSY NMR (300 MHz, CDCl<sub>3</sub>, 298 K) spectrum of PCL-*b*-PLLA diblock copolymer.

**Figure S37.** DOSY NMR (300 MHz, CDCl<sub>3</sub>, 298 K) spectrum of poly[(cyclohexene succinate) copolymer.

**Figure S38.** DOSY NMR (300 MHz, CDCl<sub>3</sub>, 298 K) spectrum of poly[(cyclohexene malonate) copolymer.

**Figure S39.** Plot of  $M_n^{(obs)}$  (kg/mol) vs. conversion (%) for *rac*-LA and  $\epsilon$ -CL using complex **1** in a ratio [Monomer]:[cat.]:[BnOH] = 200:200:1:4 in toluene at 100 °C.

**Figure S40.** GPC elugram of PLLA obtain by polymerization resumption experiment of enantiomeric pure *L*-LA and **1** in toluene at 100 °C, [monomer]:[cat.]:[BnOH] = (200<sup>1st</sup> + 200<sup>2nd</sup>):1:4.

**Figure S41.** GPC elugram of PCL obtain by polymerization resumption experiment of  $\epsilon$ -CL and **1** in toluene at 100 °C, [monomer]:[cat.]:[BnOH] = (200<sup>1st</sup> + 200<sup>2nd</sup>):1:4.

**Figure S42.** COSY NMR spectrum of poly(cyclohexene succinate) copolymer in CDCl<sub>3</sub> obtained by reaction of CHO, SA, and **1** in ratio [CHO]:[SA]:[cat.]:[BnOH] = 200:200:1:4 at 100 °C in toluene.

**Figure S43.** HMBC NMR spectrum of poly(cyclohexene succinate) copolymer in CDCl<sub>3</sub> obtained by reaction of CHO, SA, and **1** in ratio [CHO]:[SA]:[cat.]:[BnOH] = 200:200:1:4 at 100 °C in toluene.

**Figure S44.** HSQC NMR spectrum of poly(cyclohexene succinate) copolymer in CDCl<sub>3</sub> obtained by reaction of CHO, SA, and **1** in ratio [CHO]:[SA]:[cat.]:[BnOH] = 200:200:1:4 at 100 °C in toluene.

**Figure S45.** COSY NMR spectrum of poly(cyclohexene malonate) copolymer in CDCl<sub>3</sub> obtained by reaction of CHO, SA, and **1** in ratio [CHO]:[MA]:[cat.]:[BnOH] = 200:200:1:4 at 100 °C in toluene.

**Figure S46.** HMBC NMR spectrum of poly(cyclohexene malonate) copolymer in CDCl<sub>3</sub> obtained by reaction of CHO, SA, and **1** in ratio [CHO]:[MA]:[cat.]:[BnOH] = 200:200:1:4 at 100 °C in toluene.

**Figure S47.** HSQC NMR spectrum of poly(cyclohexene malonate) copolymer in CDCl<sub>3</sub> obtained by reaction of CHO, SA, and **1** in ratio [CHO]:[MA]:[cat.]:[BnOH] = 200:200:1:4 at 100 °C in toluene.

**Figure S48.** <sup>1</sup>H NMR spectrum of **2** (blue color) and **catalyst-2-OBn** (red color) in CD<sub>2</sub>Cl<sub>2</sub>. **Catalyst-2-OBn** obtained by reaction of **catalyst-2** and BnOH in ratio [Cat-2]:[BnOH] = 1:4 at 23 °C in CD<sub>2</sub>Cl<sub>2</sub>.

**Figure S49.** <sup>1</sup>H NMR spectrum **catalyst-2-OBn** in CD<sub>2</sub>Cl<sub>2</sub> obtained by reaction of **2** and BnOH in ratio [Cat-2]:[BnOH] = 1:4 at 23 °C in CD<sub>2</sub>Cl<sub>2</sub>.

**Figure S50.** MALDI-ToF spectrum of poly(cyclohexene succinate) copolymer obtained by reaction of CHO, SA, and **1** in ratio [CHO]:[SA]:[cat.]:[BnOH] = 100:200:1:4 at 100 °C in toluene at 100 °C.

**Table S2** ROP of  $\epsilon$ -CL initiated by complex **1** with varying [monomer]:[cat.]:[BnOH] molar ratios in toluene at 100 °C.

## I. Spectroscopic Characterization of 1-3

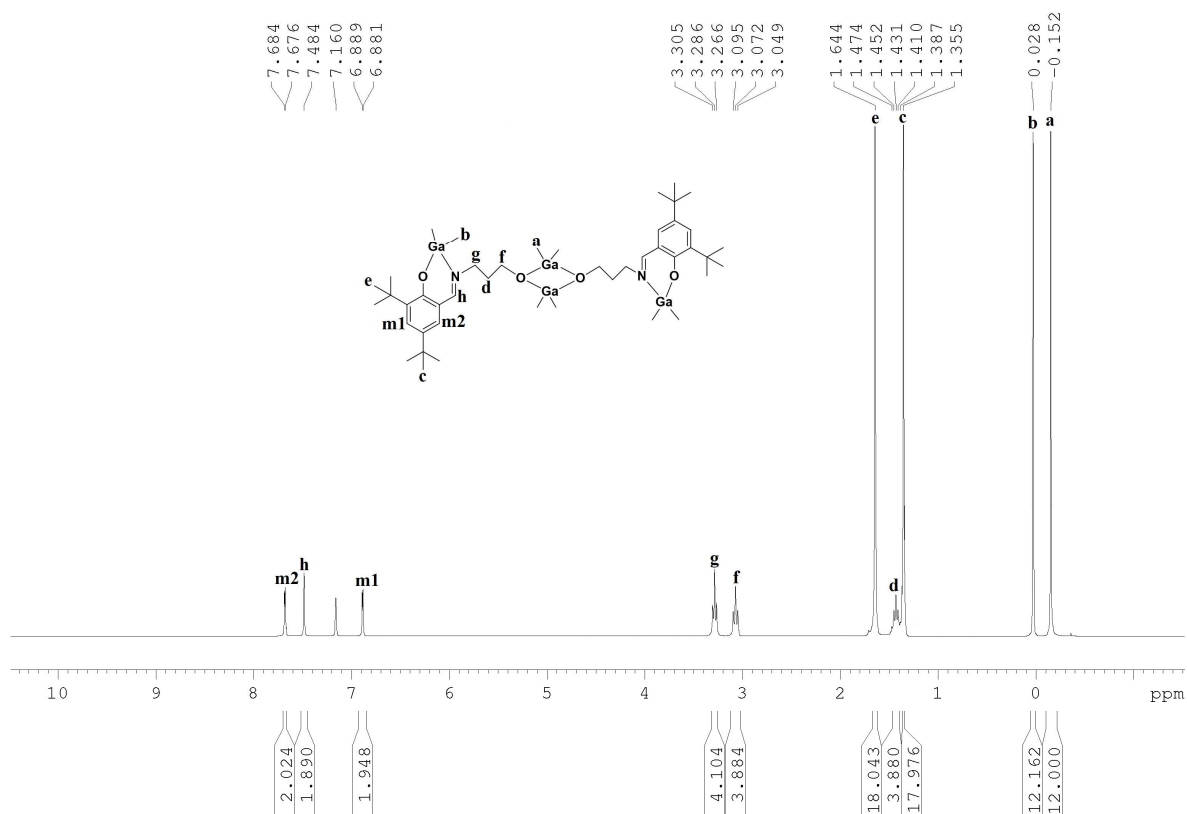

Figure S1: <sup>1</sup>H-NMR (300 MHz, C<sub>6</sub>D<sub>6</sub>, 300 K) spectrum of 1

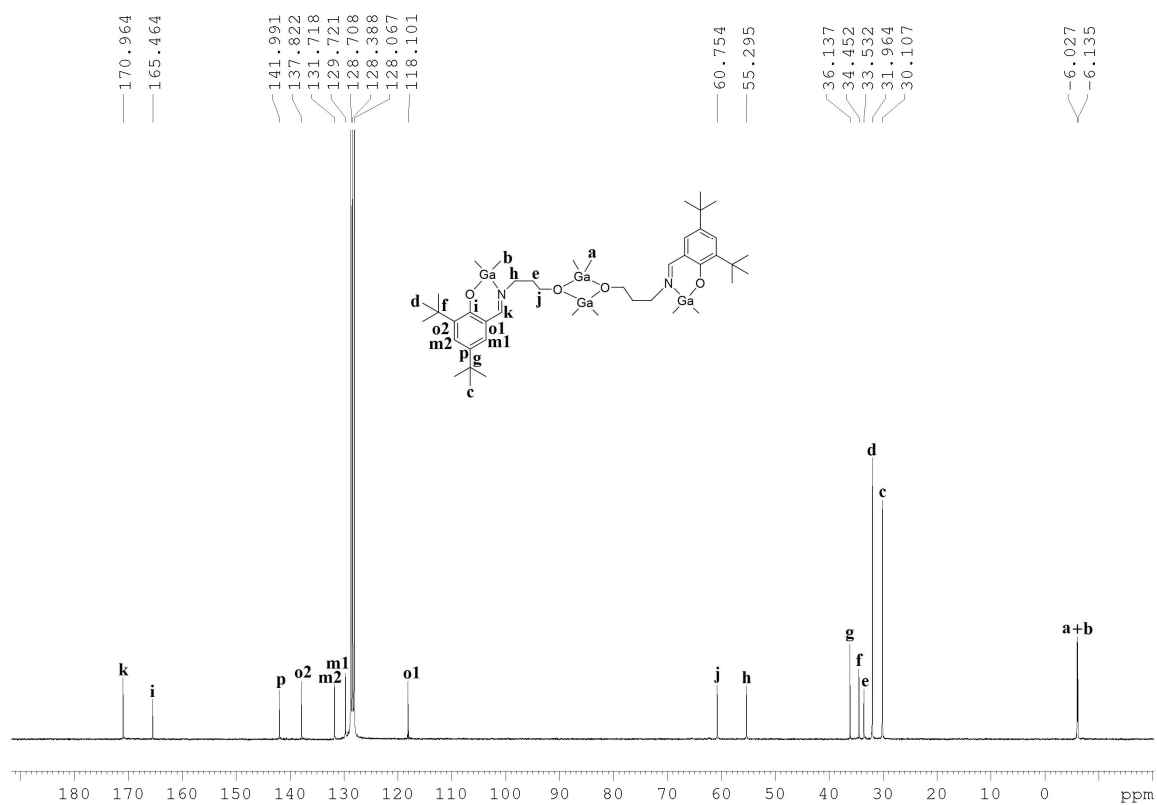

Figure S2: <sup>13</sup>C-NMR (75 MHz, C<sub>6</sub>D<sub>6</sub>, 300 K) spectrum of 1

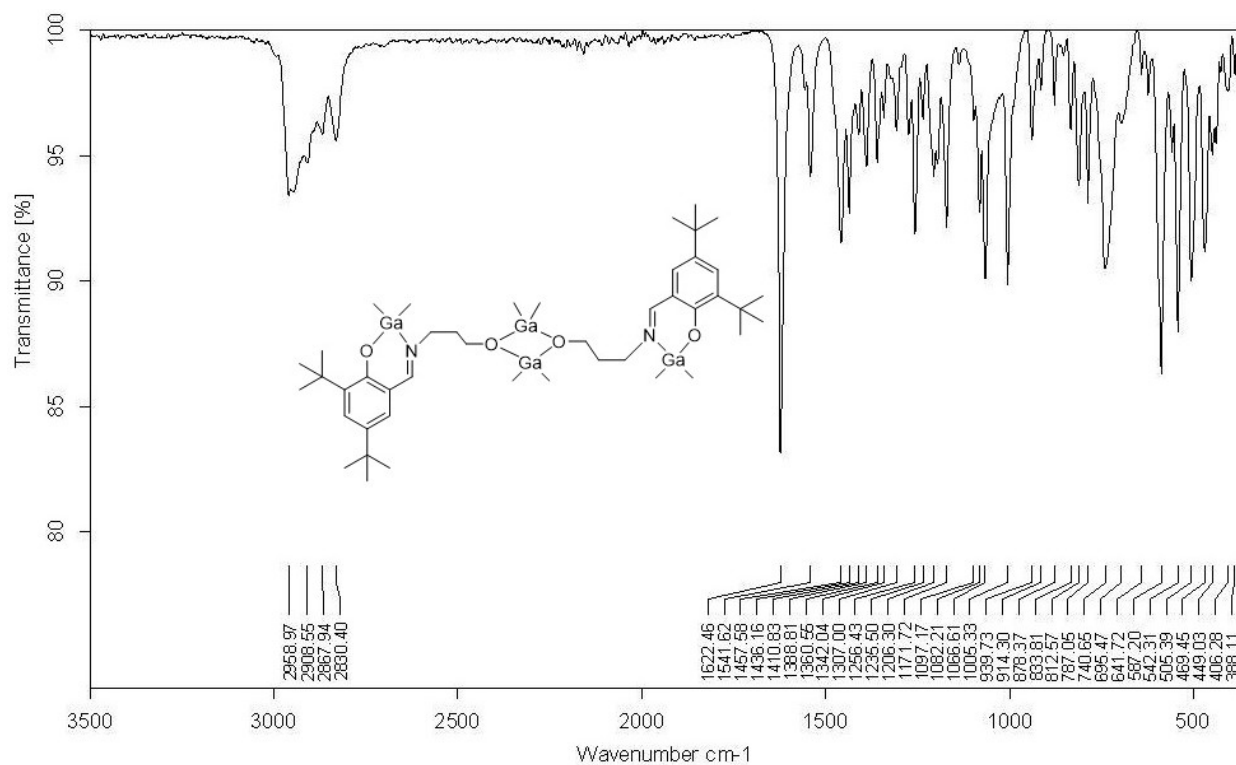

Figure S3: IR spectrum of **1**

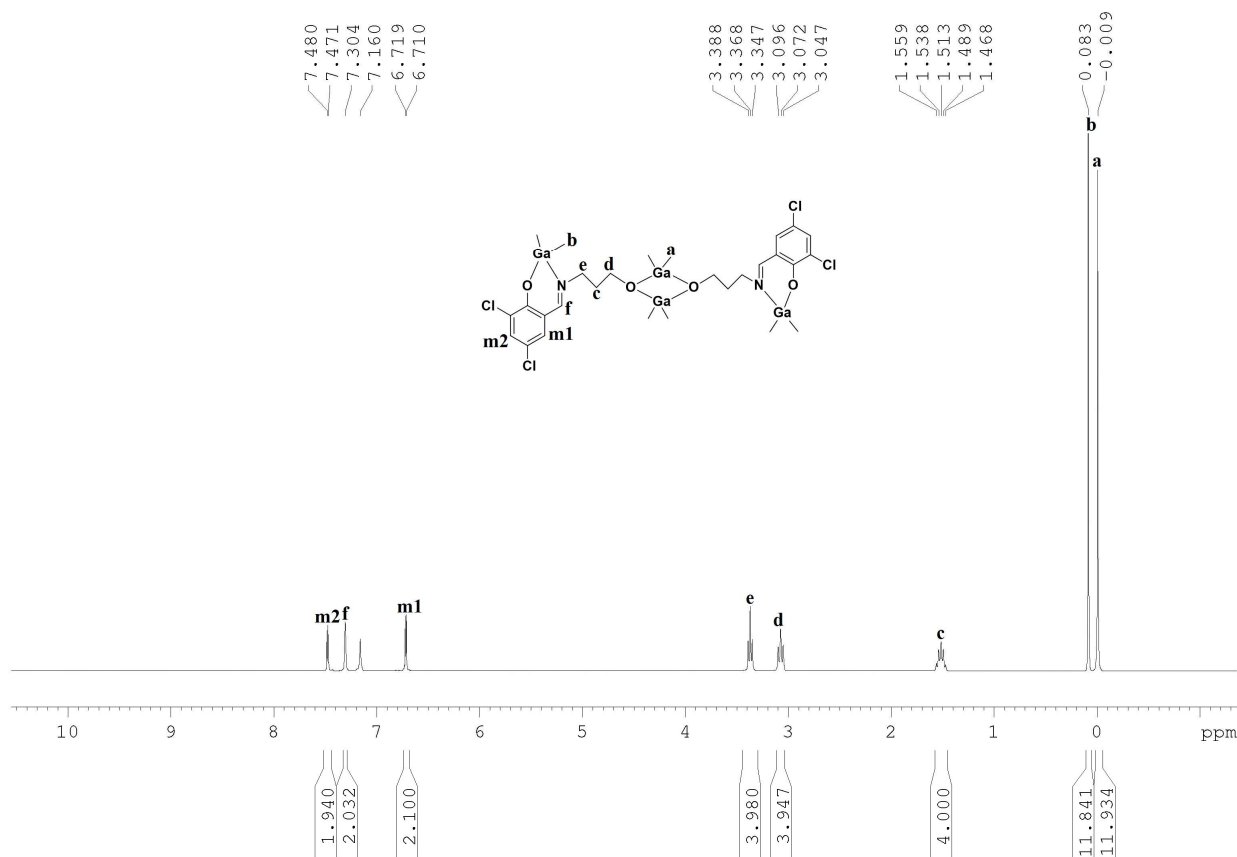

Figure S4: <sup>1</sup>H-NMR (300 MHz, C<sub>6</sub>D<sub>6</sub>, 300 K) spectrum of **2**

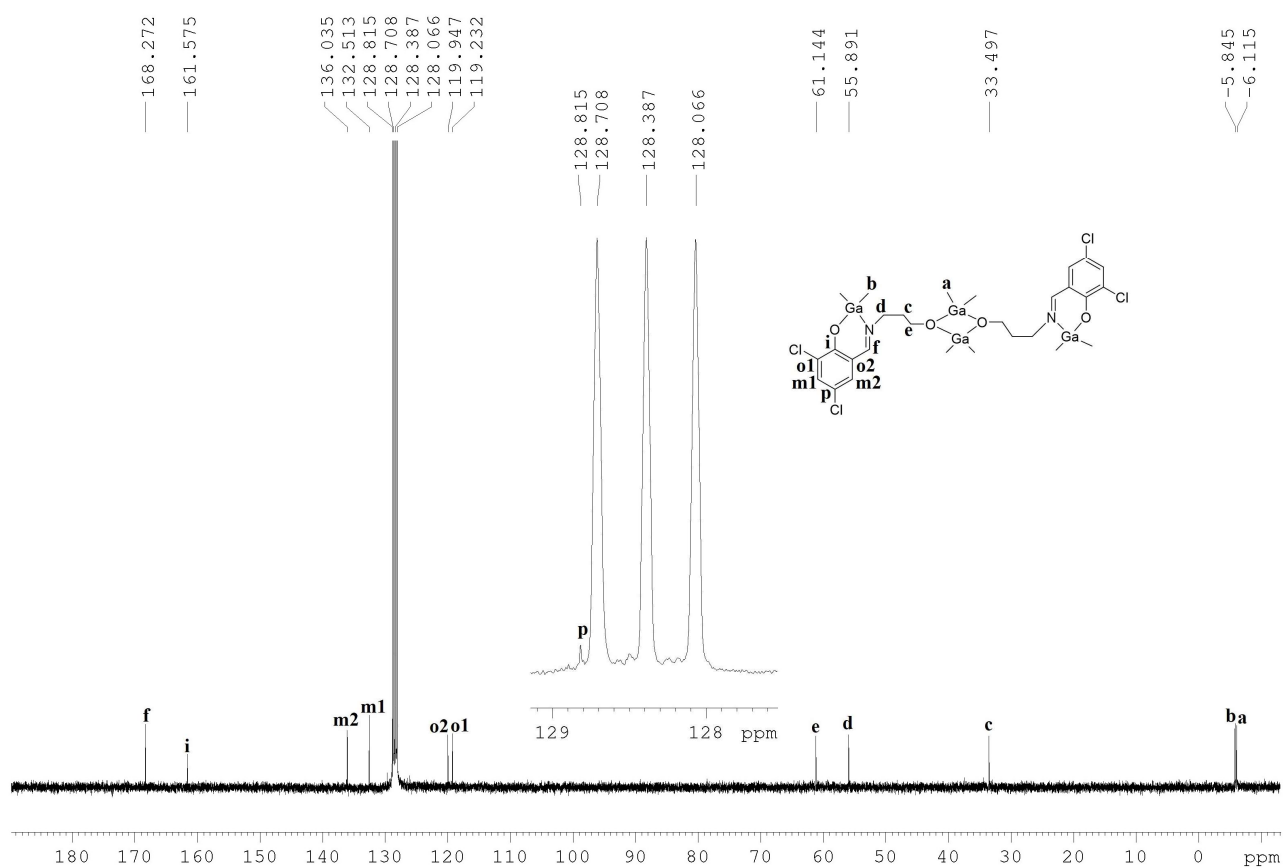

**Figure S5:**  $^{13}\text{C}$ -NMR (75 MHz,  $\text{C}_6\text{D}_6$ , 300 K) spectrum of **2**

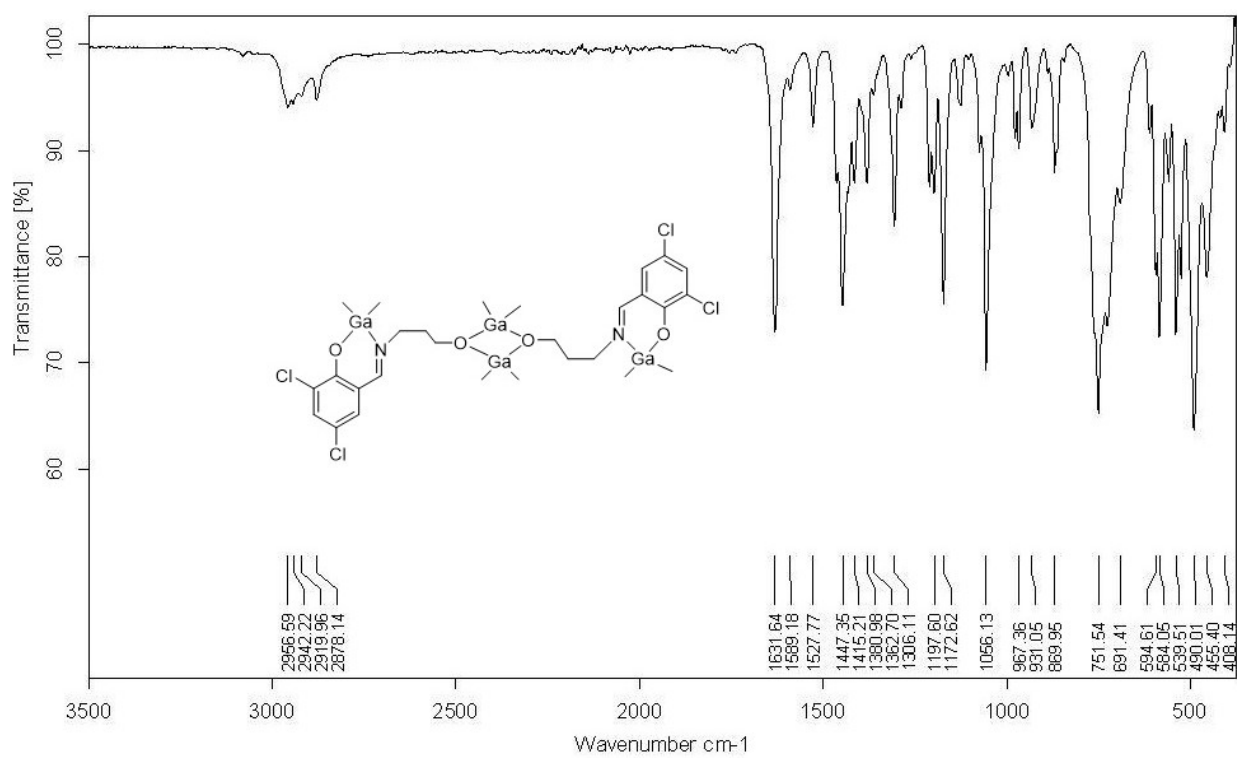

**Figure S6:** IR spectrum of **2**

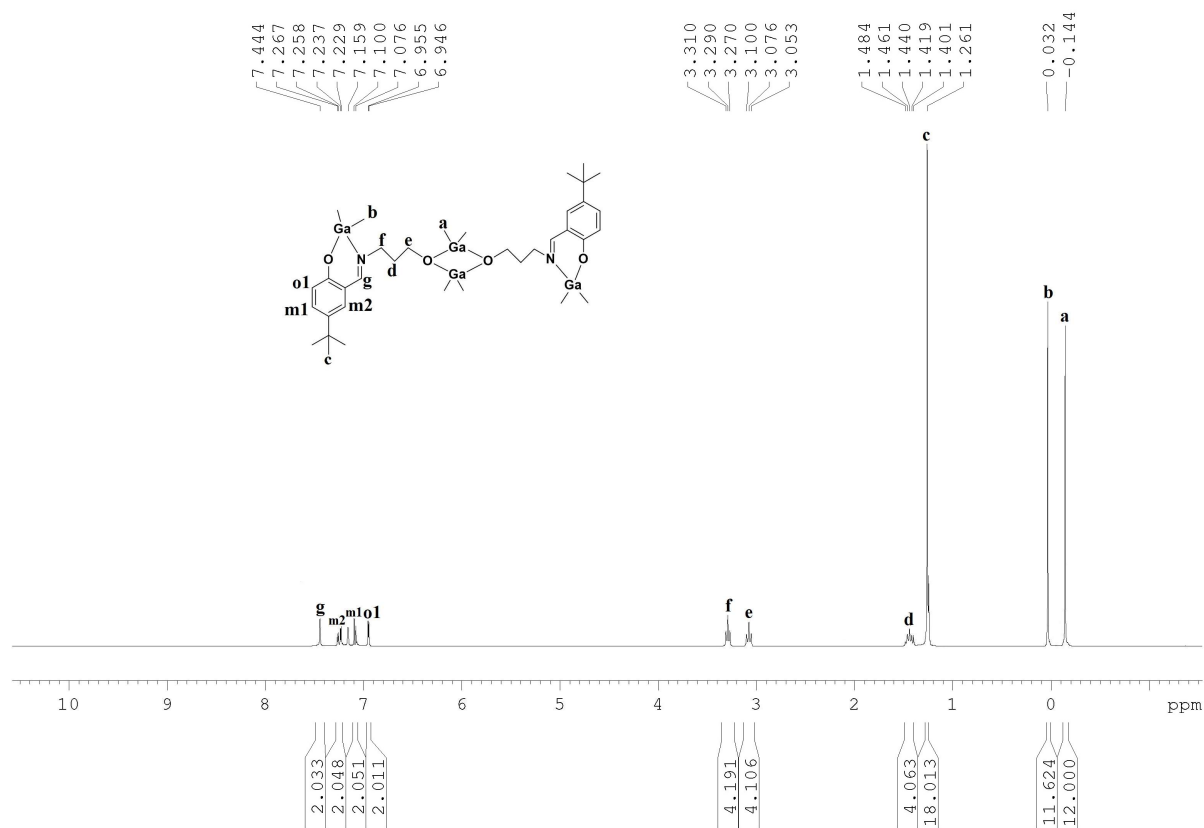

Figure S7: <sup>1</sup>H-NMR (300 MHz, C<sub>6</sub>D<sub>6</sub>, 300 K) spectrum of **3**

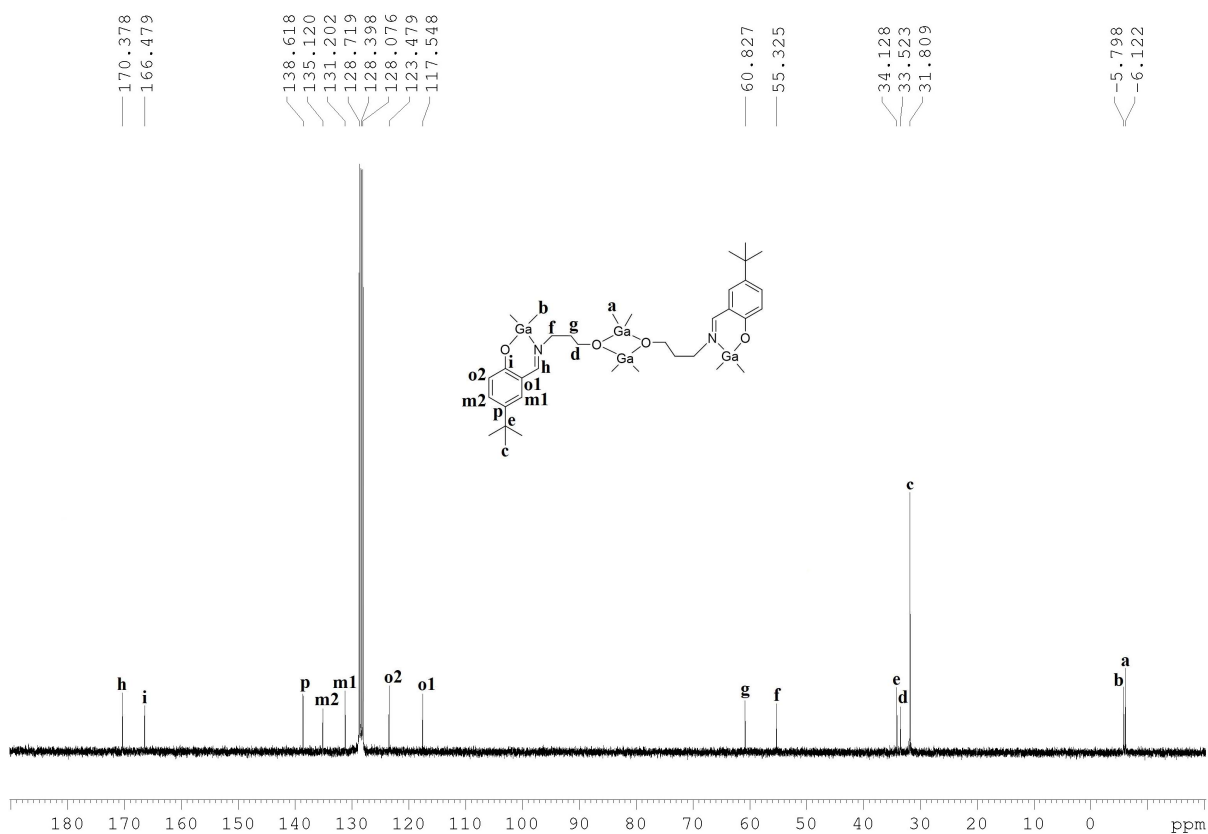

Figure S8: <sup>13</sup>C-NMR (75 MHz, C<sub>6</sub>D<sub>6</sub>, 300 K) spectrum of **3**

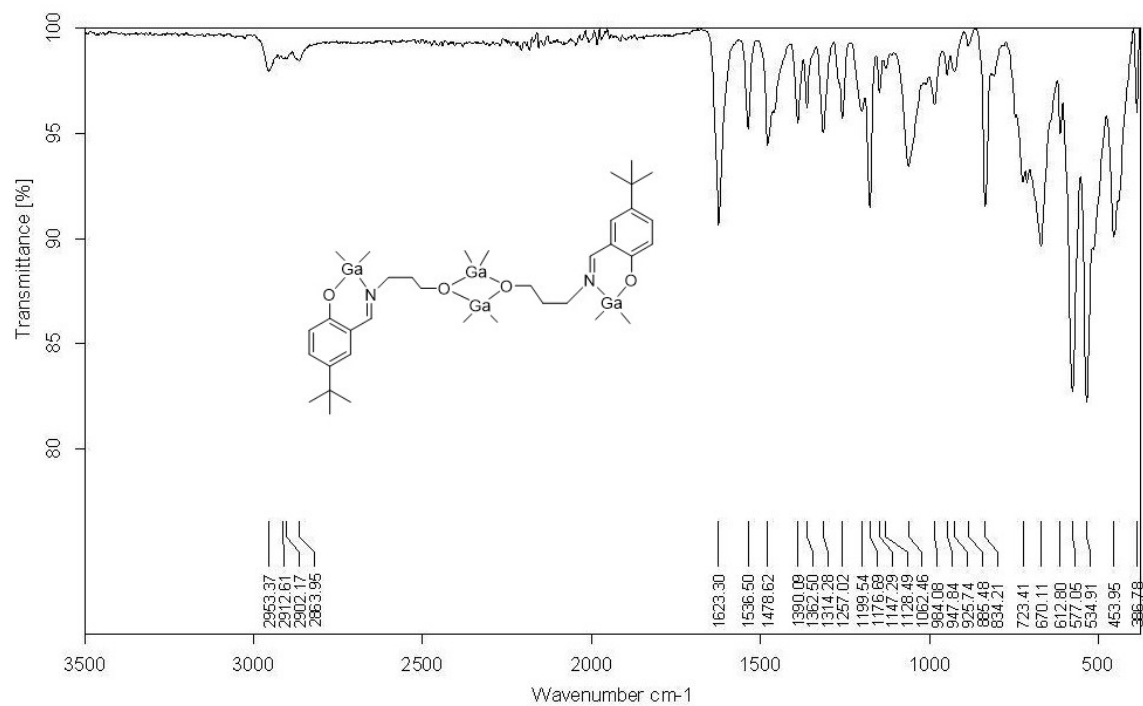

**Figure S9:** IR spectrum of **3**

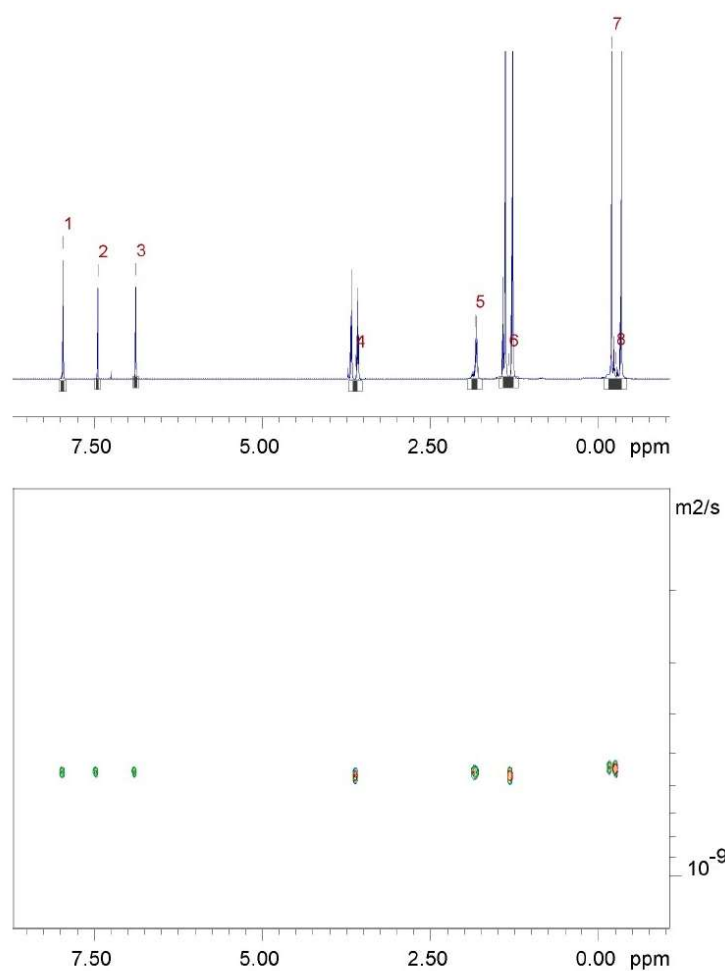

**Figure S10.** DOSY NMR spectrum of (300 MHz,  $\text{CDCl}_3$ , 298 K) spectrum of **1**



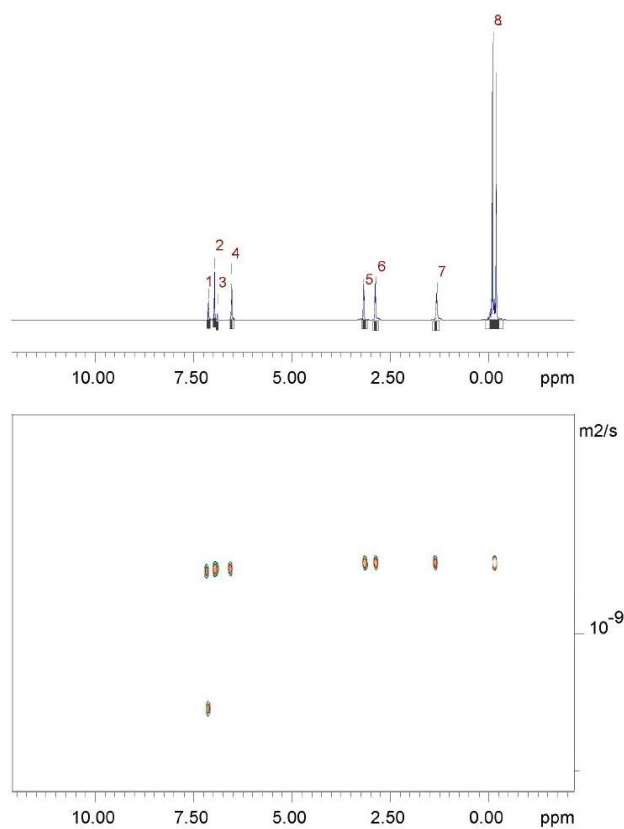

**Figure S11.** DOSY NMR spectrum of (300 MHz, C<sub>6</sub>D<sub>6</sub>, 298 K) spectrum of **2**

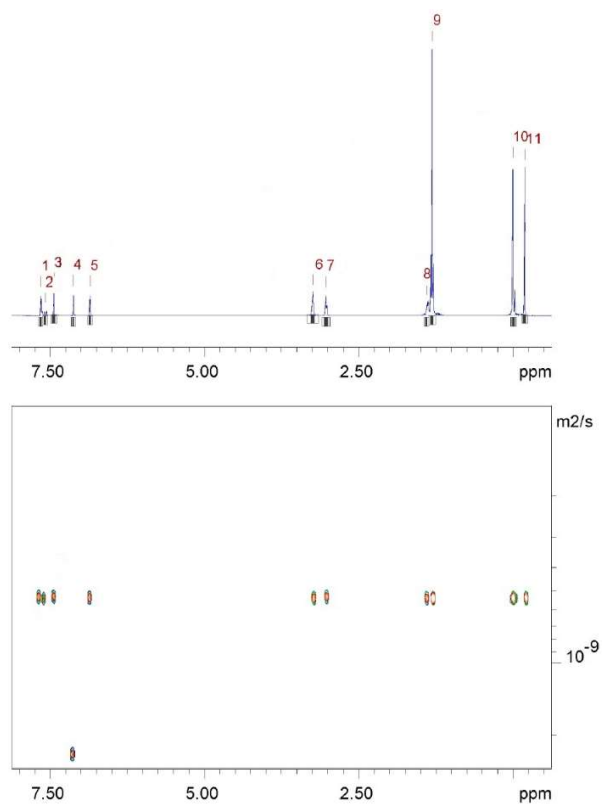

**Figure S12.** DOSY NMR spectrum of (300 MHz, C<sub>6</sub>D<sub>6</sub>, 298 K) spectrum of **3**

## II. Crystallographic Details

**Table S1** Crystal data for compound **1** and **2**

| Compounds                                           | <b>1</b>                                                                            | <b>2</b>                                                                                      |
|-----------------------------------------------------|-------------------------------------------------------------------------------------|-----------------------------------------------------------------------------------------------|
| Empirical formula                                   | C <sub>60.33</sub> H <sub>96.67</sub> Ga <sub>4</sub> N <sub>2</sub> O <sub>4</sub> | C <sub>28</sub> H <sub>42</sub> Cl <sub>4</sub> Ga <sub>4</sub> N <sub>2</sub> O <sub>4</sub> |
| Formula weight (Da)                                 | 1192.94                                                                             | 891.31                                                                                        |
| <i>T</i> /K                                         | 100(2)                                                                              | 100(2)                                                                                        |
| Wavelength (Å)                                      | 0.71073                                                                             | 1.54178                                                                                       |
| Crystal system,                                     | trigonal                                                                            | monoclinic                                                                                    |
| Space group                                         | <i>R</i> $\bar{3}$ : <i>H</i>                                                       | <i>P</i> 2 <sub>1</sub> / <i>n</i>                                                            |
| <i>a</i> /Å                                         | 39.314(7)                                                                           | 7.8895(8)                                                                                     |
| <i>b</i> /Å                                         | 39.314(7)                                                                           | 17.1647(17)                                                                                   |
| <i>c</i> /Å                                         | 10.636(2)                                                                           | 13.2719(13)                                                                                   |
| $\alpha$ (°)                                        | 90                                                                                  | 90                                                                                            |
| $\beta$ (°)                                         | 90                                                                                  | 93.448(4)                                                                                     |
| $\gamma$ (°)                                        | 120                                                                                 | 90                                                                                            |
| <i>V</i> (Å <sup>3</sup> )                          | 14237(6)                                                                            | 1794.0(3)                                                                                     |
| <i>Z</i> , Calculated density (g cm <sup>-3</sup> ) | 9, 1.252                                                                            | 2, 1.650                                                                                      |
| Absorption coefficient (mm <sup>-1</sup> )          | 1.727                                                                               | 6.447                                                                                         |
| Crystal size (mm)                                   | 0.275 × 0.215 × 0.186                                                               | 0.151 × 0.089 × 0.044                                                                         |
| Theta range for data collection (°)                 | 1.794°- 33.288°                                                                     | 4.215°- 81.023°                                                                               |
| Reflections collected                               | 64996                                                                               | 54968                                                                                         |
| Independent reflections                             | 11471                                                                               | 3917                                                                                          |
| Data/restraints/parameters                          | 8827/216/451                                                                        | 3917 / 0 / 194                                                                                |
| Goodness-of-fit on <i>F</i> <sup>2</sup>            | 1.088                                                                               | 1.068                                                                                         |
| Final <i>R</i> indices [ <i>I</i> > 2σ( <i>I</i> )] | <i>R</i> 1 = 0.0429                                                                 | <i>R</i> 1 = 0.0274                                                                           |
|                                                     | <i>wR</i> 2 = 0.0933                                                                | <i>wR</i> 2 = 0.0718                                                                          |
| <i>R</i> indices (all data)                         | <i>R</i> 1 = 0.0633                                                                 | <i>R</i> 1 = 0.0293                                                                           |
|                                                     | <i>wR</i> 2 = 0.0997                                                                | <i>wR</i> 2 = 0.0738                                                                          |

### III. Polymerization Studies

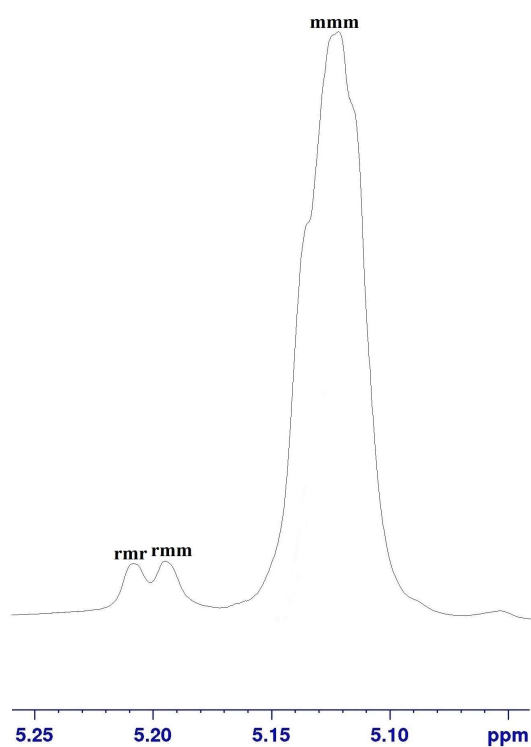

**Figure S13.** Homonuclear decoupled <sup>1</sup>H-NMR spectrum of *rac*-PLA in CDCl<sub>3</sub> (methine H-atom region) obtained by reaction of *rac*-LA and **1** in ratio [monomer]:[Cat.]:[BnOH] = 200:1:4 at 100 °C in toluene.

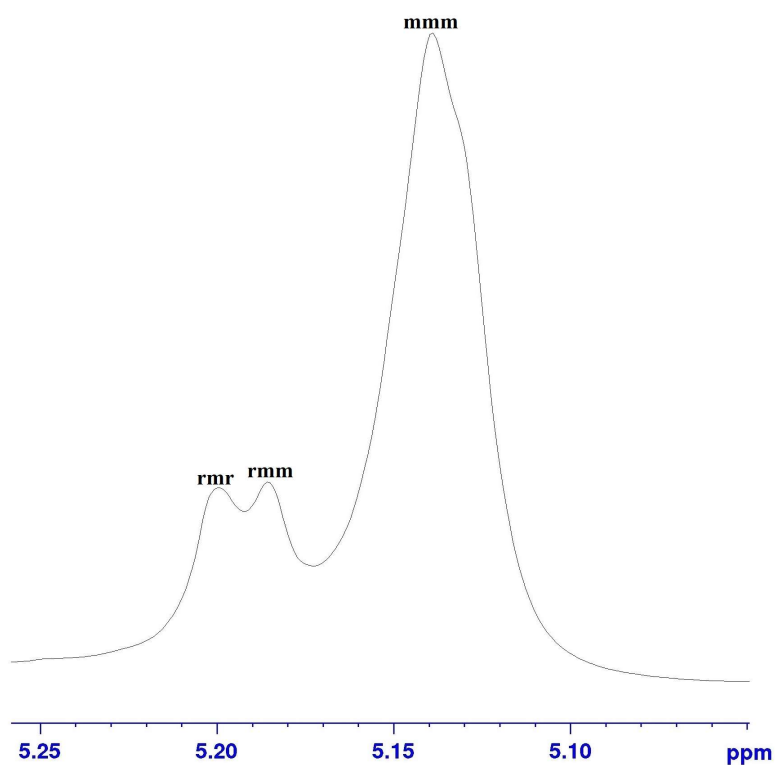

**Figure S14.** Homonuclear decoupled <sup>1</sup>H-NMR spectrum of *rac*-PLA in CDCl<sub>3</sub> (methine H-atom region) obtained by reaction of *rac*-LA and **2** in ratio [monomer]:[Cat.]:[BnOH] = 200:1:4 at 100 °C in toluene.

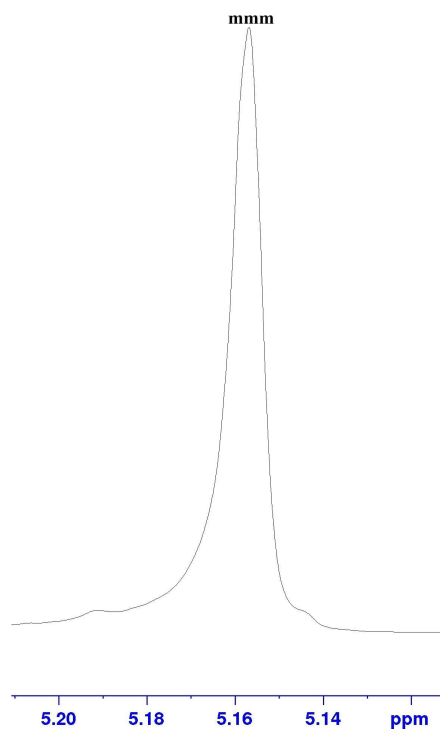

**Figure S15.** Homonuclear decoupled  $^1\text{H}$ -NMR spectrum of *L*-PLA in  $\text{CDCl}_3$  (methine H-atom region) obtained by reaction of *L*-LA and **1** in ratio [monomer]:[Cat.]:[BnOH] = 200:1:4 at 100 °C in toluene.

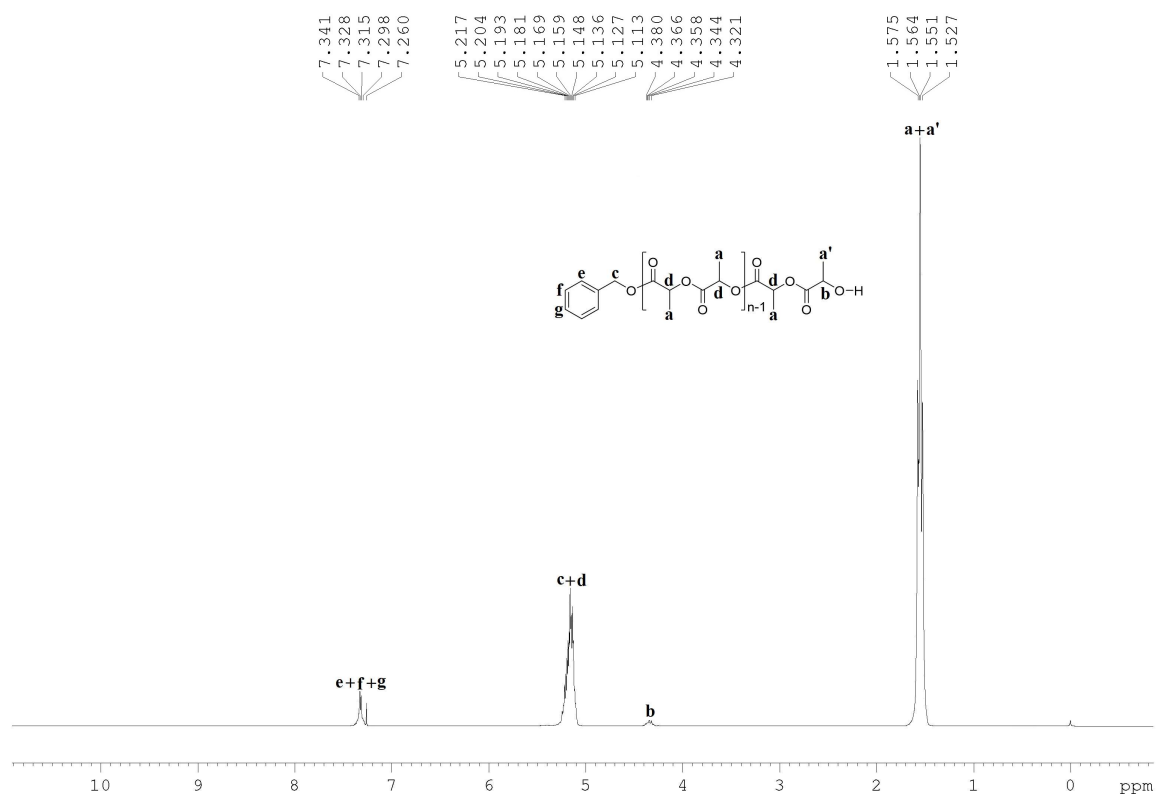

**Figure S16.**  $^1\text{H}$ -NMR spectrum of *rac*-PLA in  $\text{CDCl}_3$  obtained by reaction of *rac*-LA and **1** in ratio [monomer]:[Cat.]:[BnOH] = 100:1:4 at 100 °C in toluene.



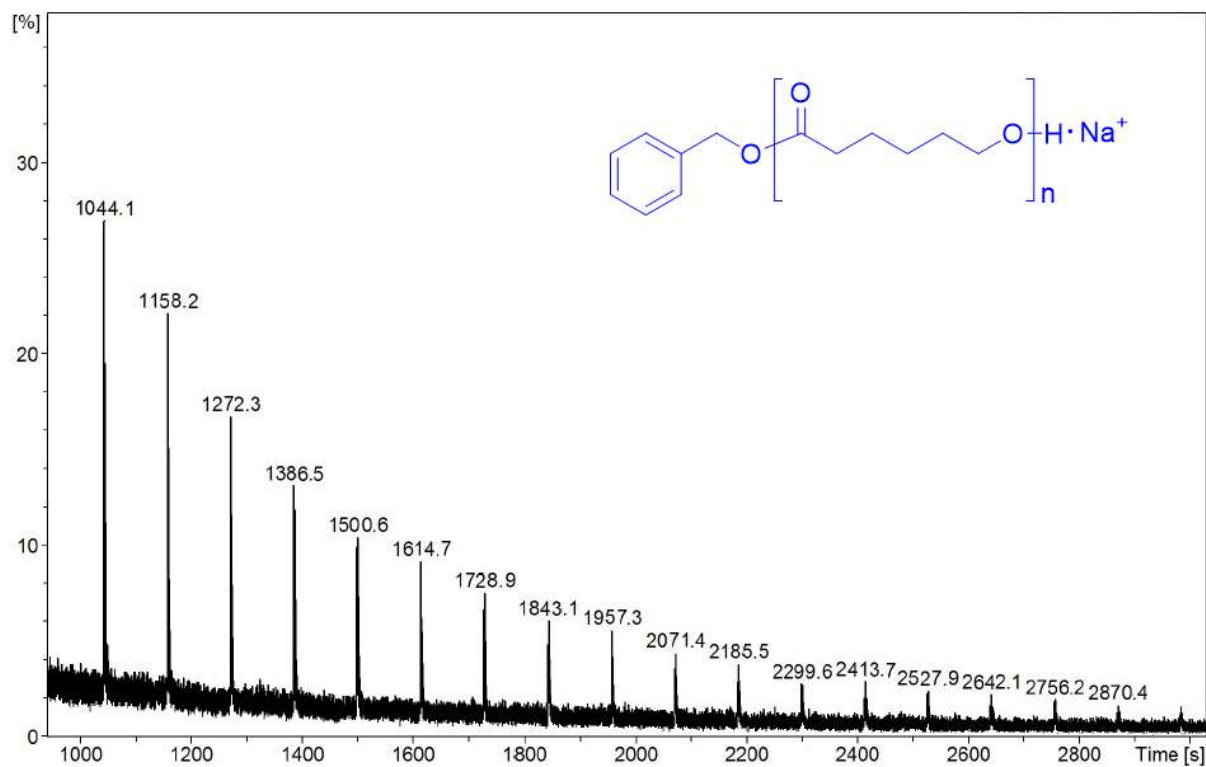

**Figure S19.** MALDI-ToF spectrum of  $\epsilon$ -PCL obtained by reaction of  $\epsilon$ -CL and **1** in ratio [monomer]:[Cat.]:[BnOH] = 100:1:4 at 100 °C in toluene.

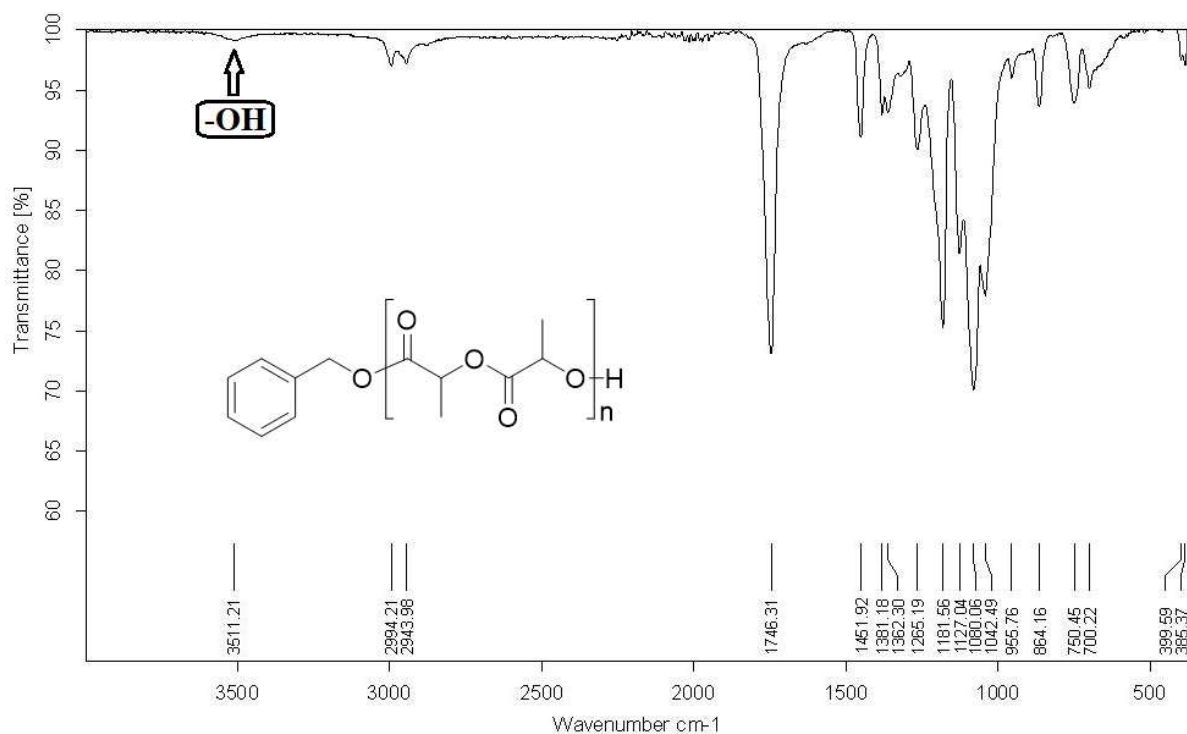

**Figure S20.** IR spectrum of *rac*-PLA obtained by reaction of *rac*-LA and **1** in ratio [monomer]:[Cat.]:[BnOH] = 100:1:4 at 100 °C in toluene.

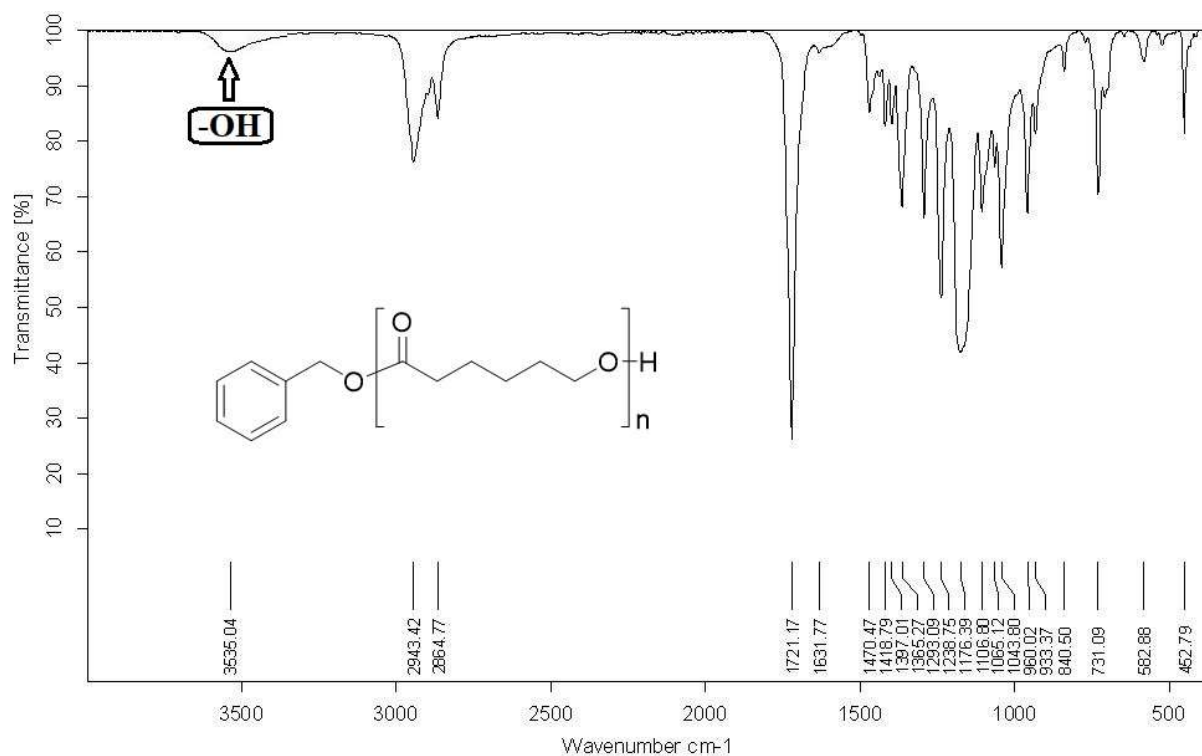

**Figure S21.** IR spectrum of of PCL in  $\text{CDCl}_3$  obtained by reaction of  $\epsilon\text{-CL}$  and **1** in ratio [monomer]:[Cat.]:[BnOH] = 100:1:4 at 100 °C in toluene.

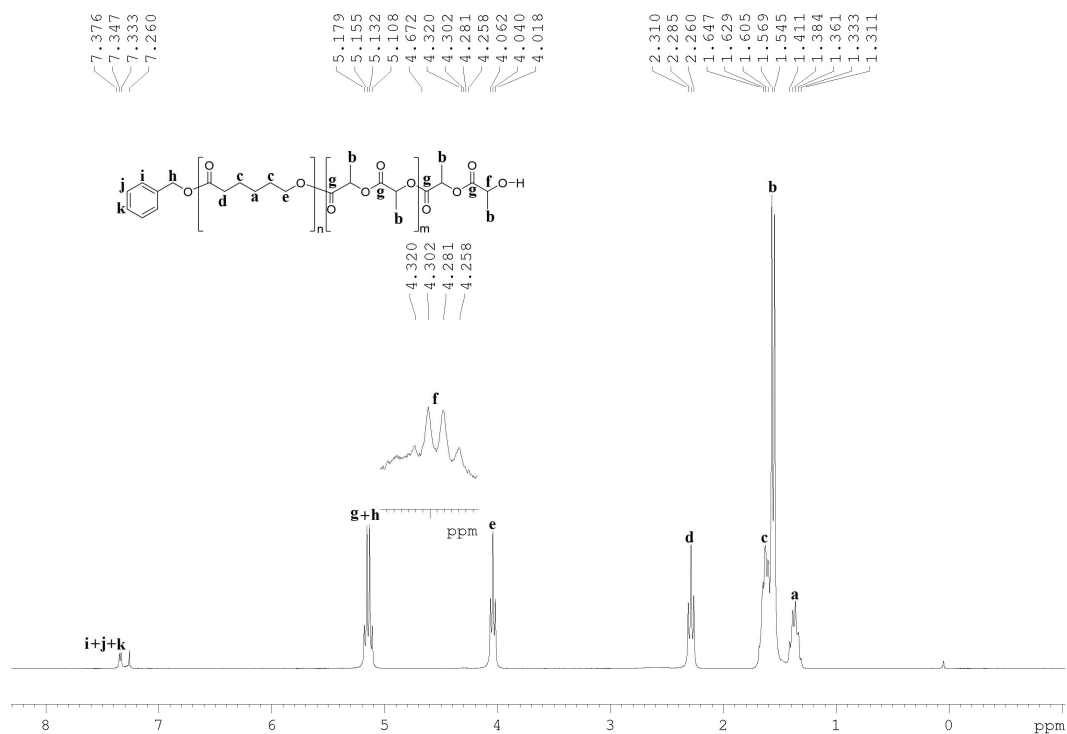

**Figure S22.**  $^1\text{H}$  NMR spectrum of PCL-b-PLLA copolymer in  $\text{CDCl}_3$  obtained by reaction of  $\epsilon\text{-CL}$ , *L*-LA and **1** in ratio [ $\epsilon\text{-CL}$ ]:[*L*-LA]:[cat.]:[BnOH] = 200:200:1:4 at 100 °C in toluene.

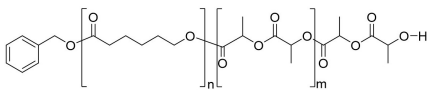

**b**

Figure 1b illustrates the hierarchical structure of the 1000 Genomes Project. The diagram shows three main clusters of populations, each represented by a tree diagram. The first cluster on the left includes populations from Africa, Europe, and East Asia. The middle cluster includes populations from South Asia, Admixed American, and African American. The right cluster includes populations from Europe, East Asia, and Admixed American. Each tree diagram shows the genetic relationships and admixture between the populations, with numerical values indicating the proportion of ancestry from each parent population.

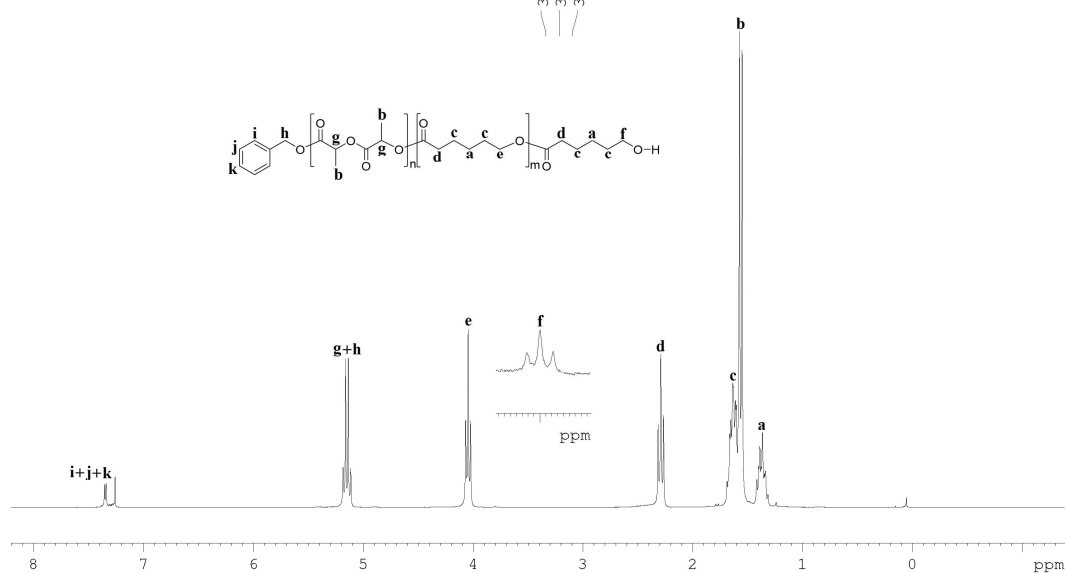

S16



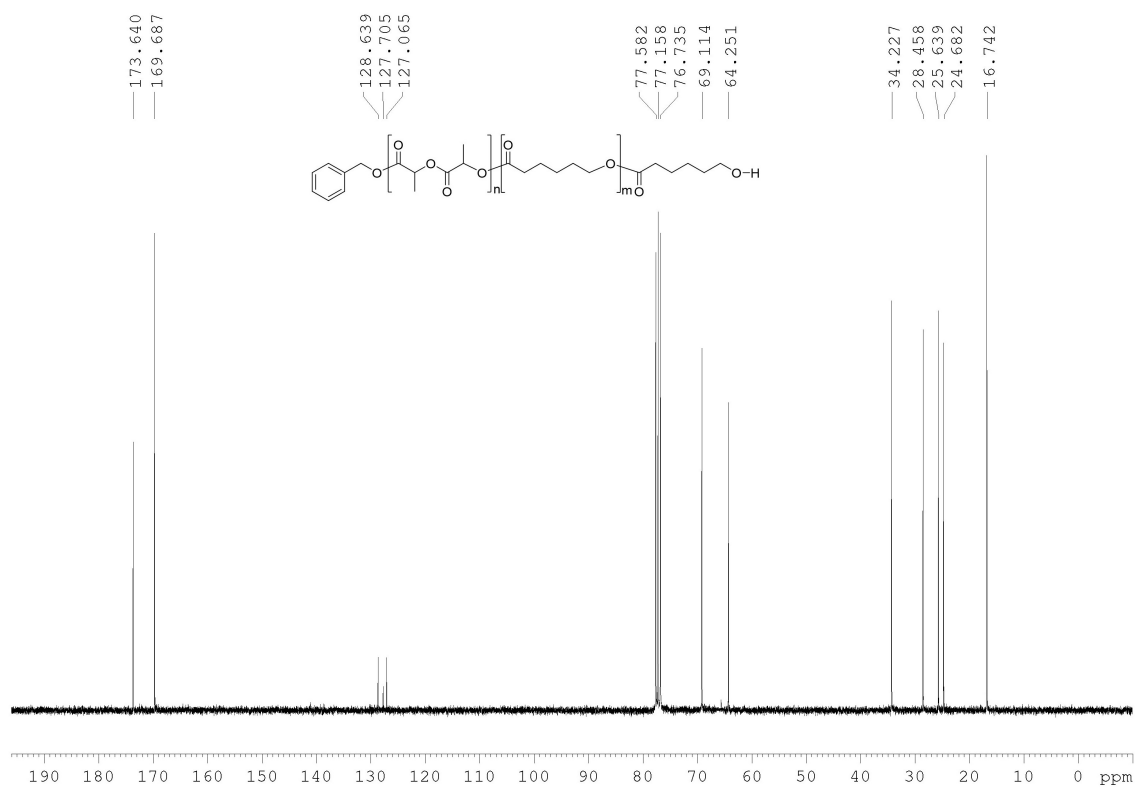

**Figure S25.**  $^{13}\text{C}$  NMR spectrum of PLLA-b-PCL copolymer in  $\text{CDCl}_3$  obtained by reaction of *L*-LA,  $\epsilon$ -CL, and **1** in ratio  $[\text{L-LA}]:[\epsilon\text{-CL}]:[\text{cat.}]:[\text{BnOH}] = 200:200:1:4$  at  $100^\circ\text{C}$  in toluene.

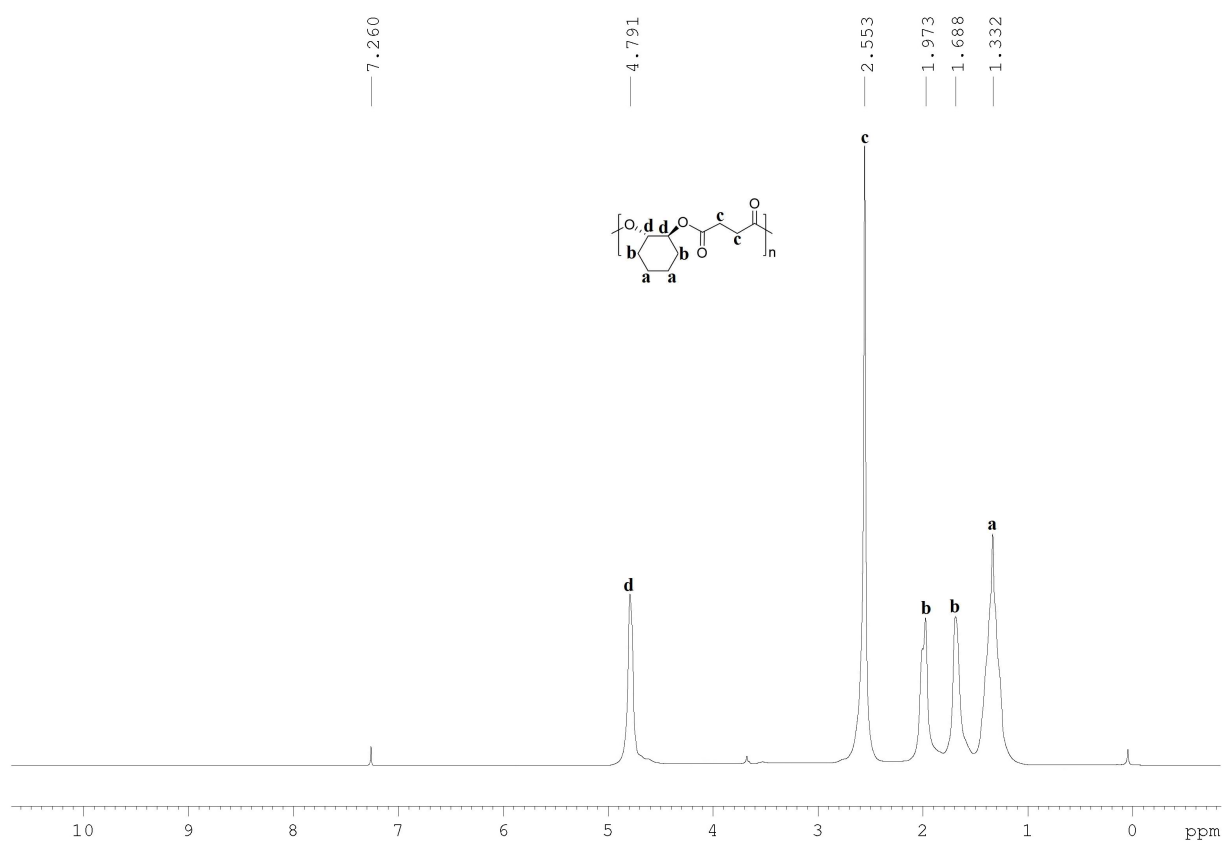

**Figure S26.**  $^1\text{H}$  NMR spectrum of poly(cyclohexene succinate) copolymer in  $\text{CDCl}_3$  obtained by reaction of CHO, SA, and **1** in ratio  $[\text{CHO}]:[\text{SA}]:[\text{cat.}]:[\text{BnOH}] = 200:200:1:4$  at  $100^\circ\text{C}$  in toluene.

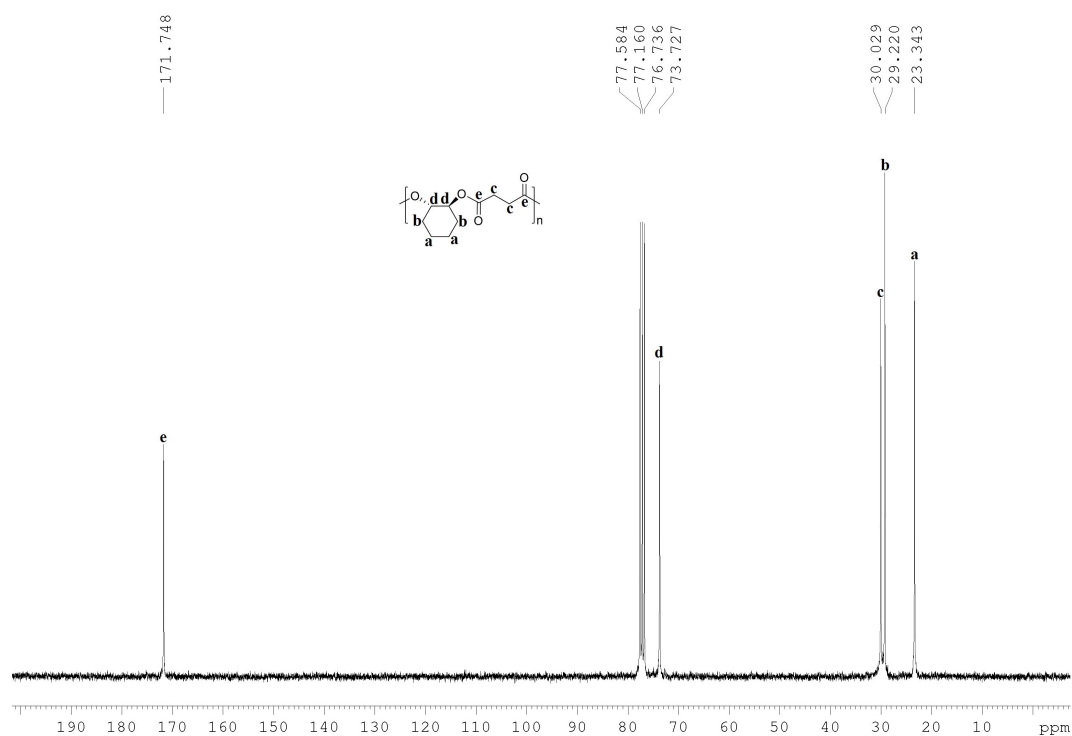

**Figure S27.**  $^{13}\text{C}$  NMR spectrum of poly(cyclohexene succinate) copolymer in  $\text{CDCl}_3$  obtained by reaction of CHO, SA, and **1** in ratio  $[\text{CHO}]:[\text{SA}]:[\text{cat.}]:[\text{BnOH}] = 200:200:1:4$  at  $100^\circ\text{C}$  in toluene.

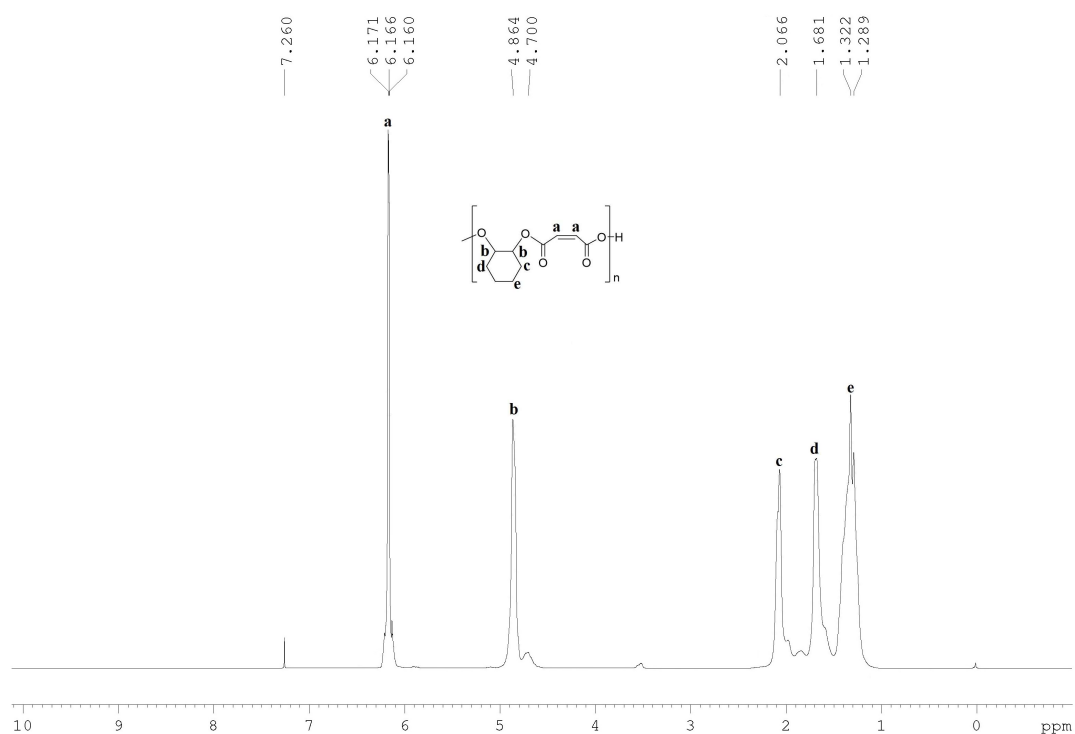

**Figure S28.**  $^1\text{H}$  NMR spectrum of poly(cyclohexene malonate) copolymer in  $\text{CDCl}_3$  obtained by reaction of CHO, SA, and **1** in ratio  $[\text{CHO}]:[\text{MA}]:[\text{cat.}]:[\text{BnOH}] = 200:200:1:4$  at  $100^\circ\text{C}$  in toluene.

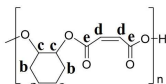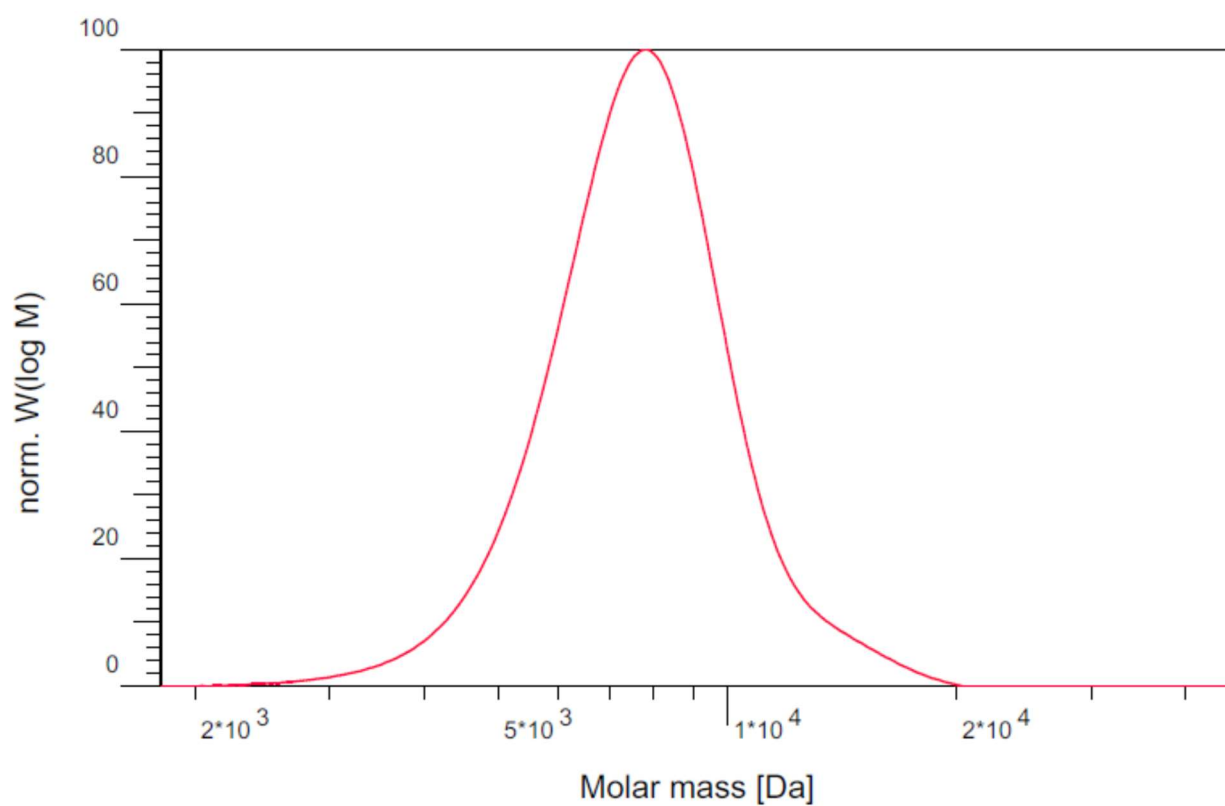

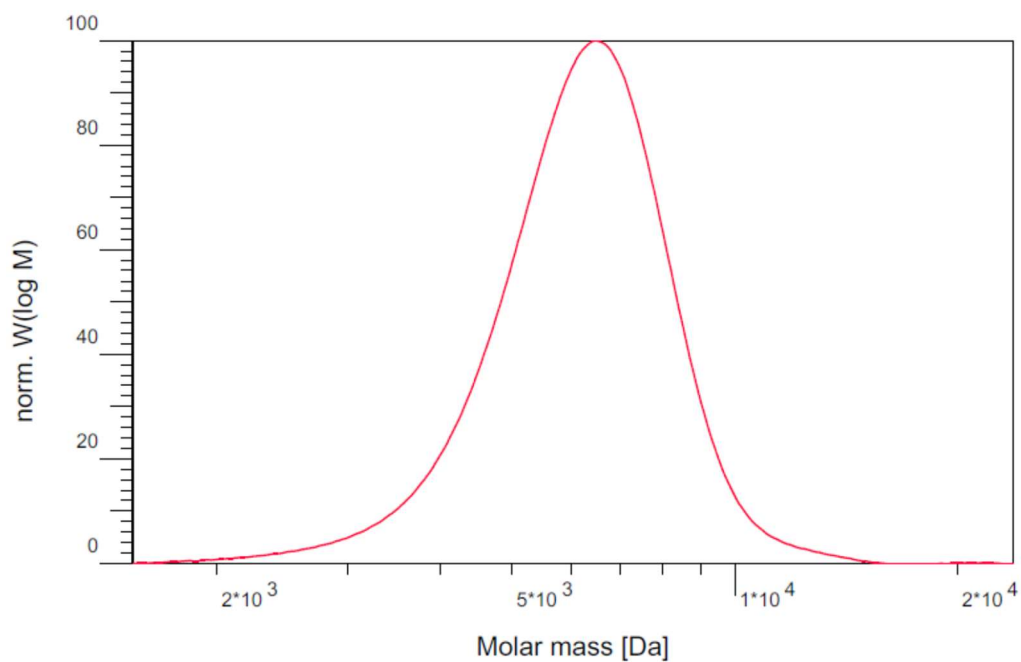

**Figure S31.** GPC elugram of PCL obtained by reaction of  $\epsilon$ -CL and **1** in ratio [monomer]:[Cat.]:[BnOH] = 200:1:4 at 100 °C in toluene.

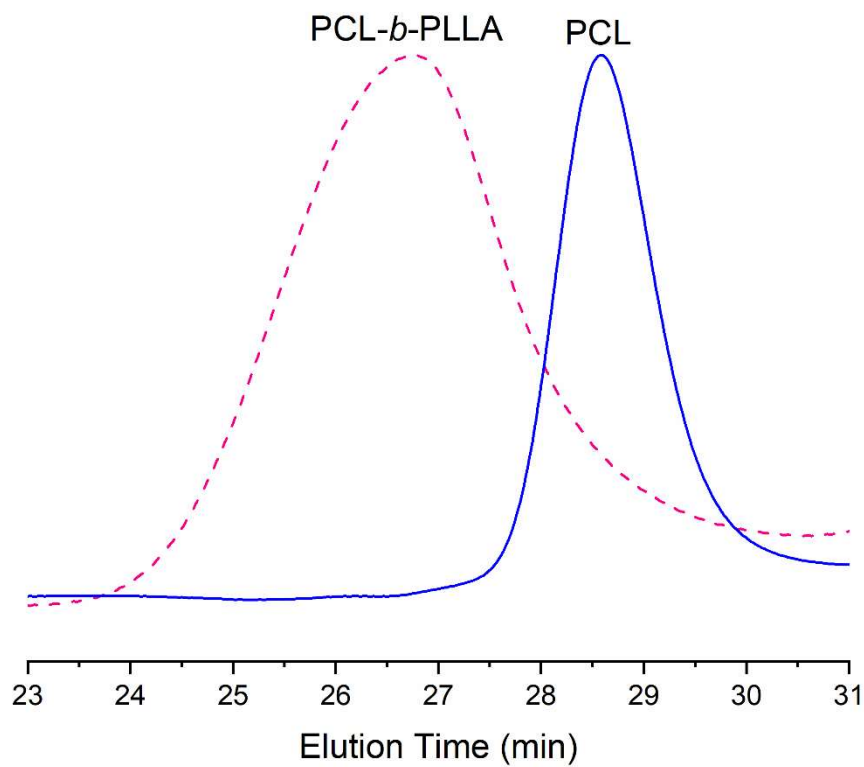

**Figure S32.** GPC elugram of PCL and PCL-*b*-PLLA obtained by the **1** in presence of BnOH at 100 °C in toluene.

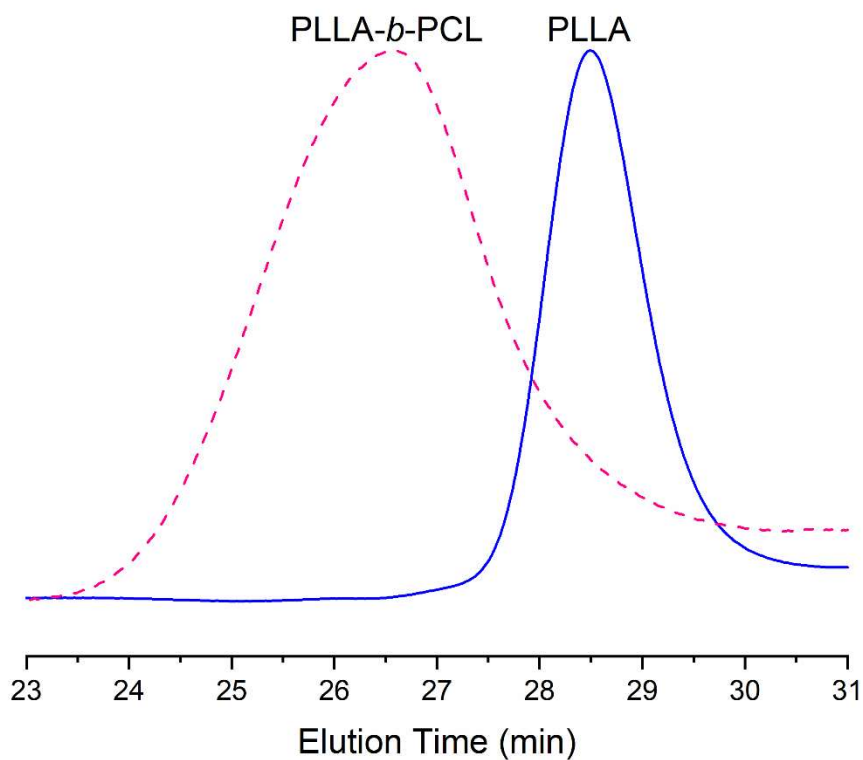

**Figure S33.** GPC elugram of PLLA and PLLA-*b*-PCL obtained by the **1** in the presence of BnOH at 100 °C in toluene.

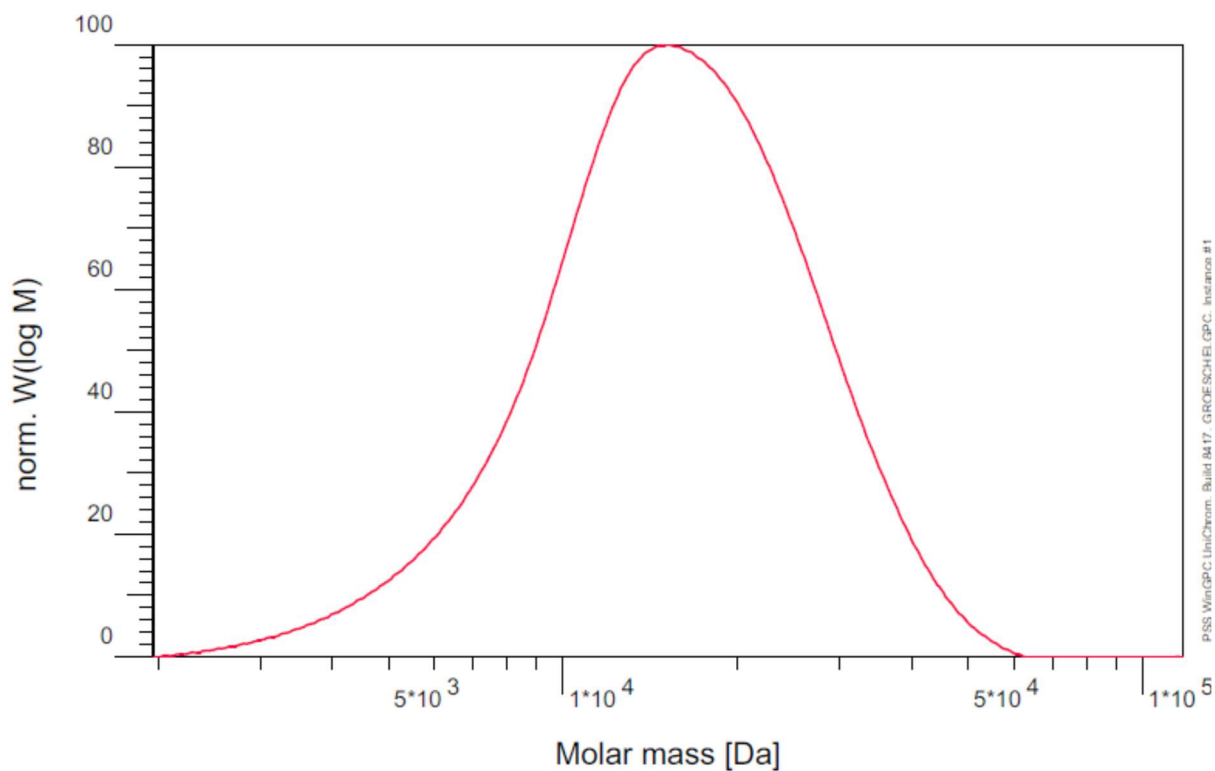

**Figure S34.** GPC elugram of poly(cyclohexenesuccinate) copolymer obtained by reaction of CHO, SA, and **1** in ratio [CHO]:[SA]:[cat.]:[BnOH] = 200:200:1:4 at 100 °C in toluene.

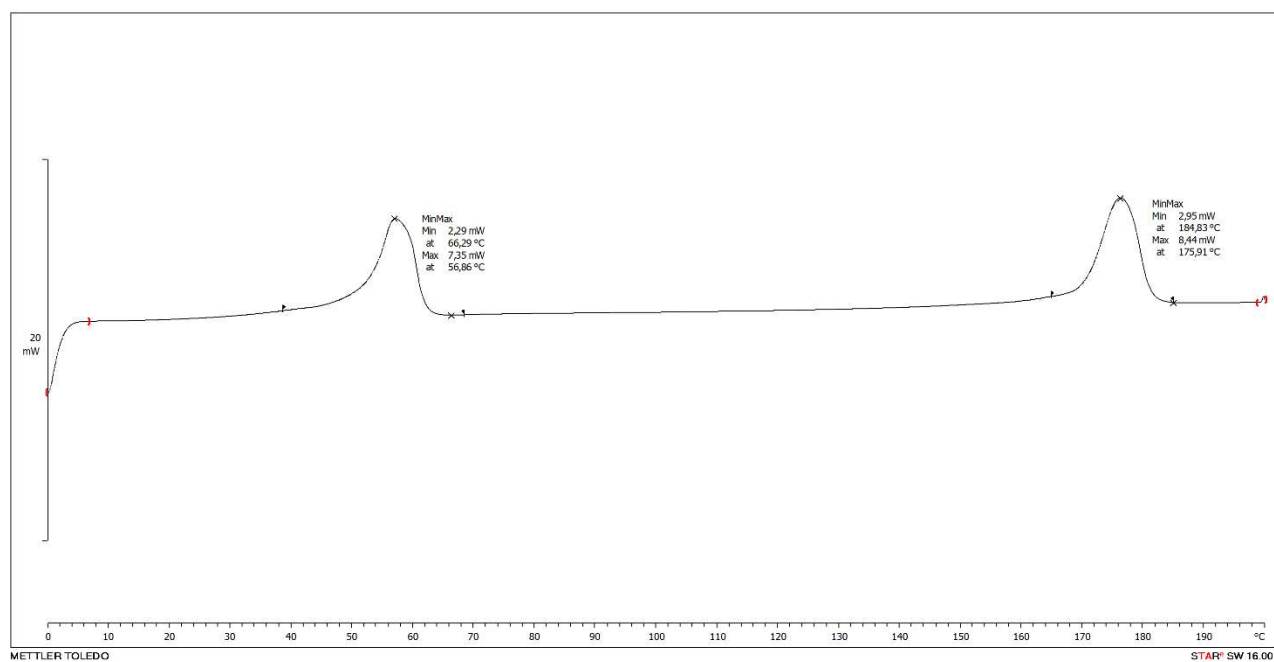

**Figure S35.** DSC curve of PCL-*b*-PLLA obtained by reaction of  $\epsilon$ -CL, *L*-LA and **1** in ratio [ $\epsilon$ -CL]:[*L*-LA]:[cat.]:[BnOH] = 200:200:1:4 at 100 °C in toluene.

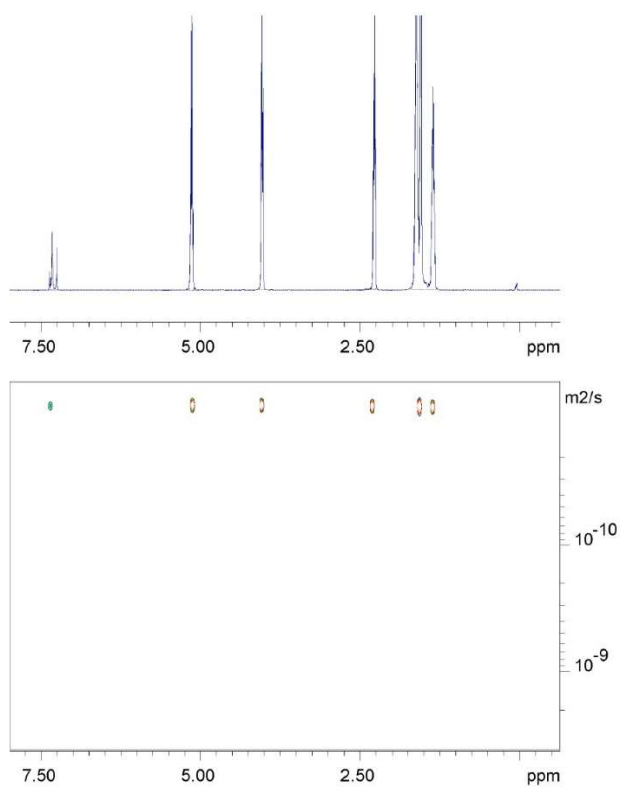

**Figure S36.** DOSY NMR (300 MHz, CDCl<sub>3</sub>, 298 K) spectrum of PCL-*b*-PLLA diblock copolymer.

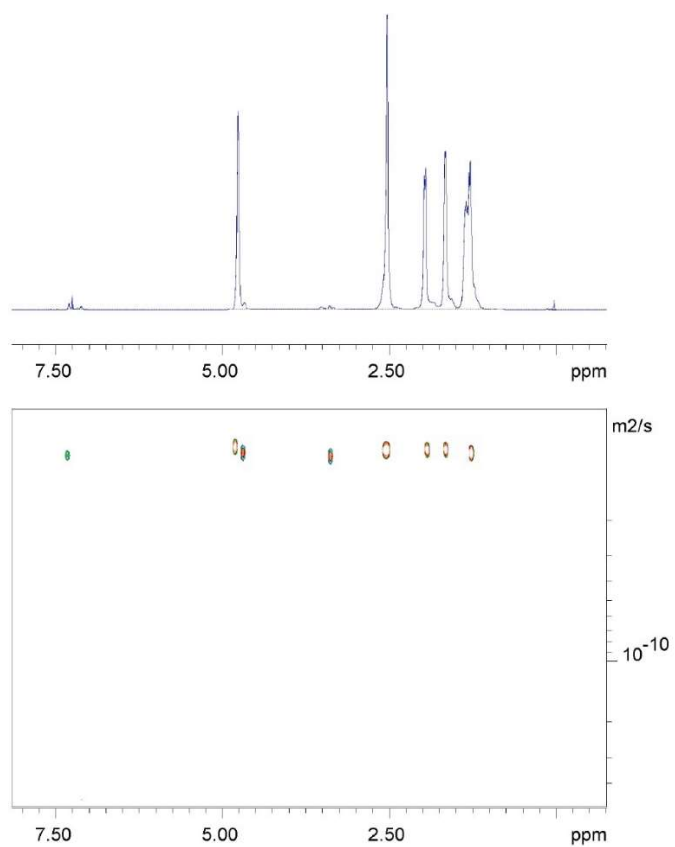

**Figure S37.** DOSY NMR (300 MHz,  $\text{CDCl}_3$ , 298 K) spectrum of poly[(cyclohexene succinate) copolymer].

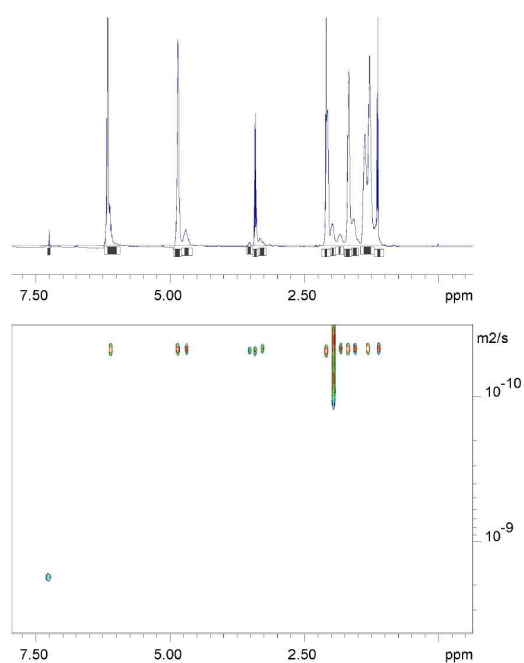

**Figure S38.** DOSY NMR (300 MHz,  $\text{CDCl}_3$ , 298 K) spectrum of poly[(cyclohexene malonate) copolymer].

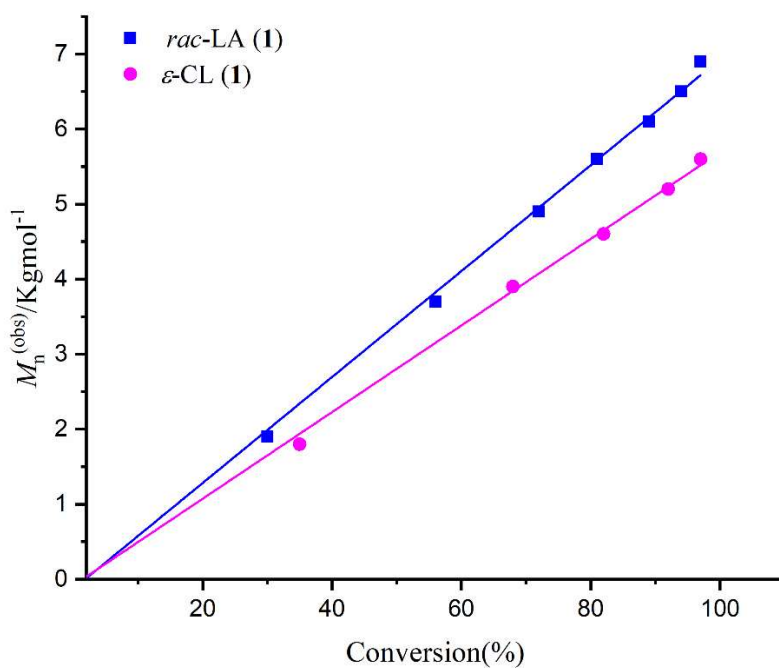

**Figure S39.** Plot of  $M_n^{(obs)}$  (kg/mol) vs. conversion (%) for *rac*-LA and  $\epsilon$ -CL using complex **1** in a ratio [Monomer]:[cat.]:[BnOH] = 200:200:1:4 in toluene at 100 °C.

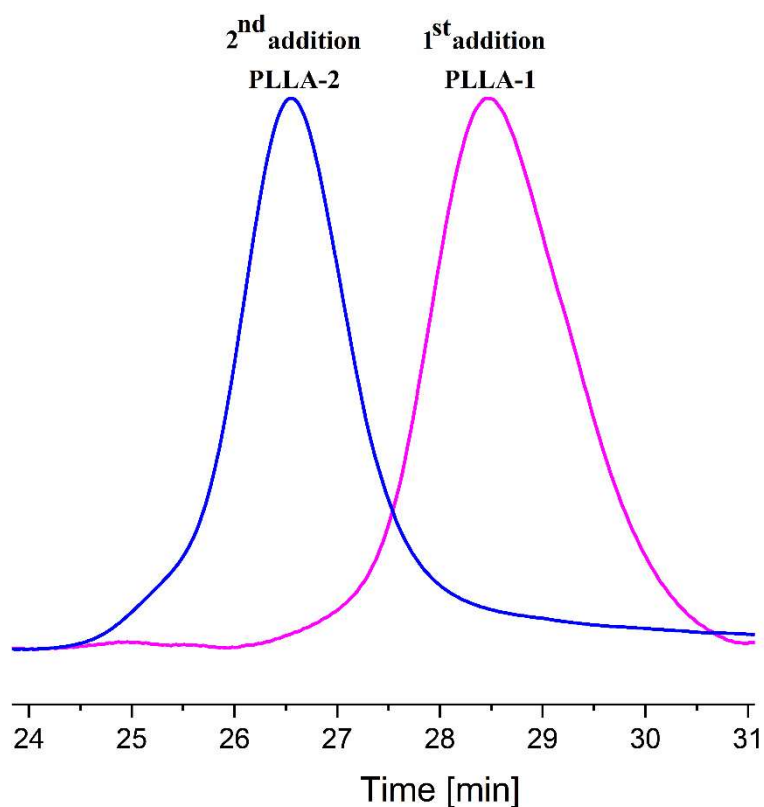

**Figure S40.** GPC elugram of PLLA obtain by polymerization resumption experiment of enantiomeric pure *L*-LA and **1** in toluene at 100 °C, [monomer]:[cat.]:[BnOH] = (200<sup>1st</sup> + 200<sup>2nd</sup>):1:4.



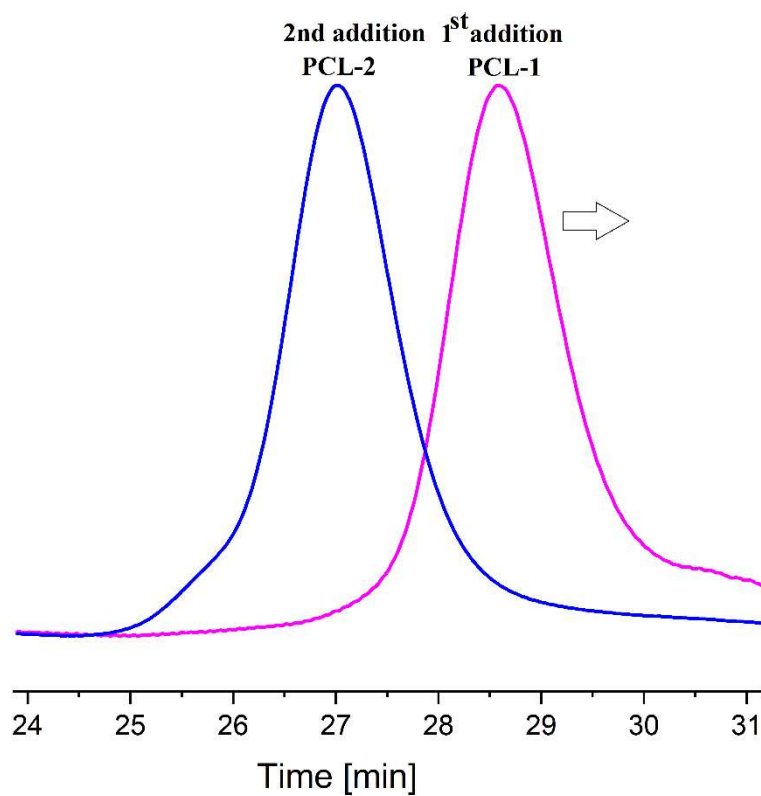

**Figure S41.** GPC elugram of PCL obtain by polymerization resumption experiment of  $\epsilon$ -CL and **1** in toluene at 100 °C, [monomer]:[cat.]:[BnOH] = (200<sup>1st</sup> + 200<sup>2nd</sup>):1:4.

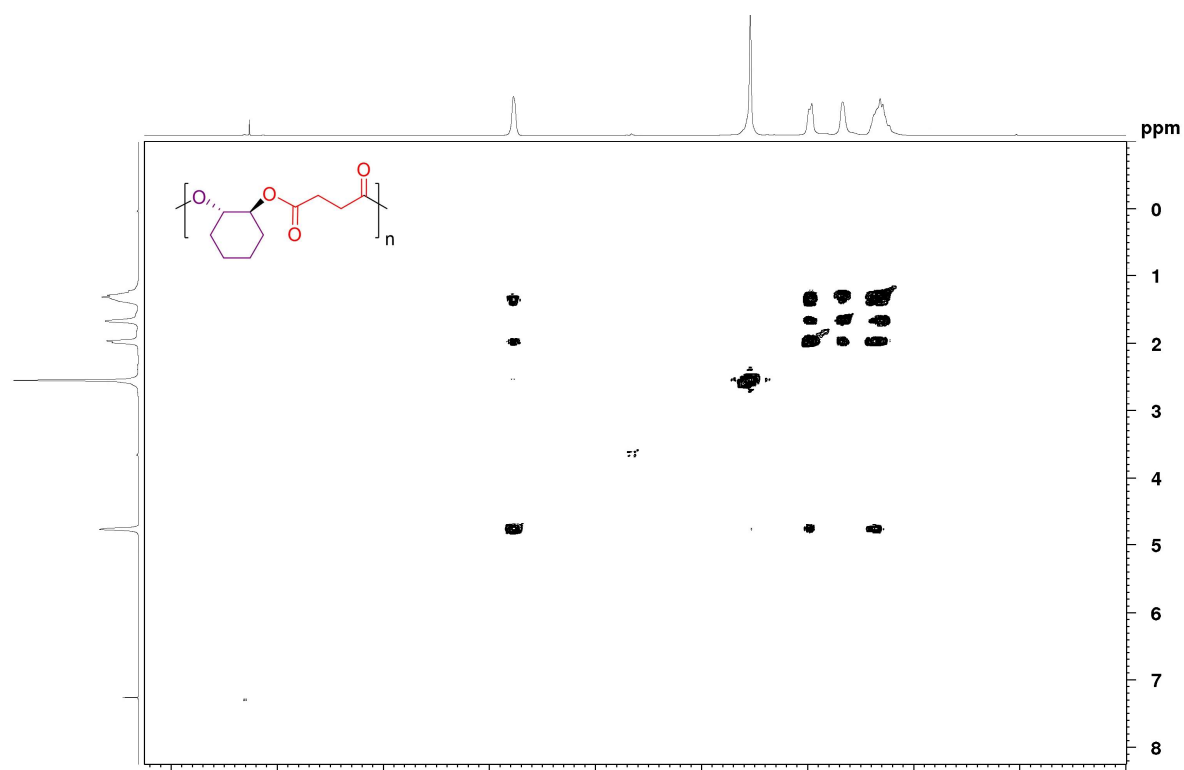

**Figure S42.** COSY NMR spectrum of poly(cyclohexene succinate) copolymer in CDCl<sub>3</sub> obtained by reaction of CHO, SA, and **1** in ratio [CHO]:[ SA]:[cat.]:[BnOH] = 200:200:1:4 at 100 °C in toluene.

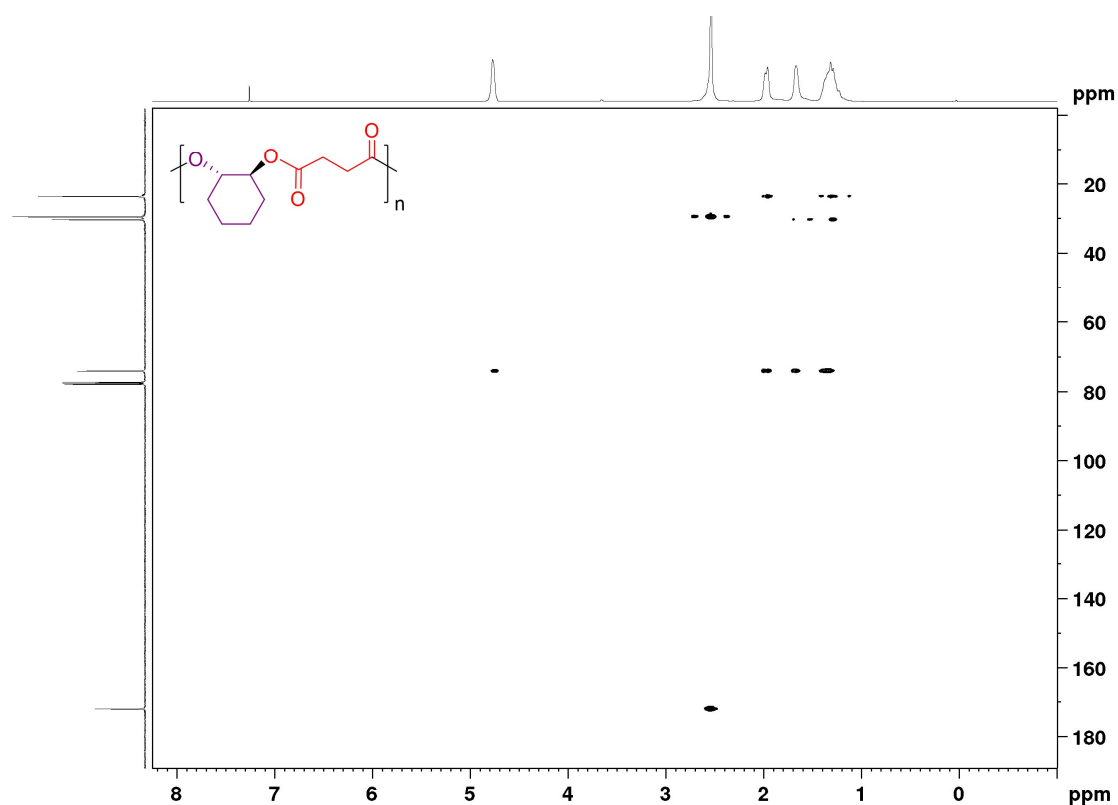

**Figure S43.** HMBC NMR spectrum of poly(cyclohexene succinate) copolymer in  $\text{CDCl}_3$  obtained by reaction of CHO, SA, and **1** in ratio  $[\text{CHO}]:[\text{SA}]:[\text{cat.}]:[\text{BnOH}] = 200:200:1:4$  at  $100^\circ\text{C}$  in toluene.

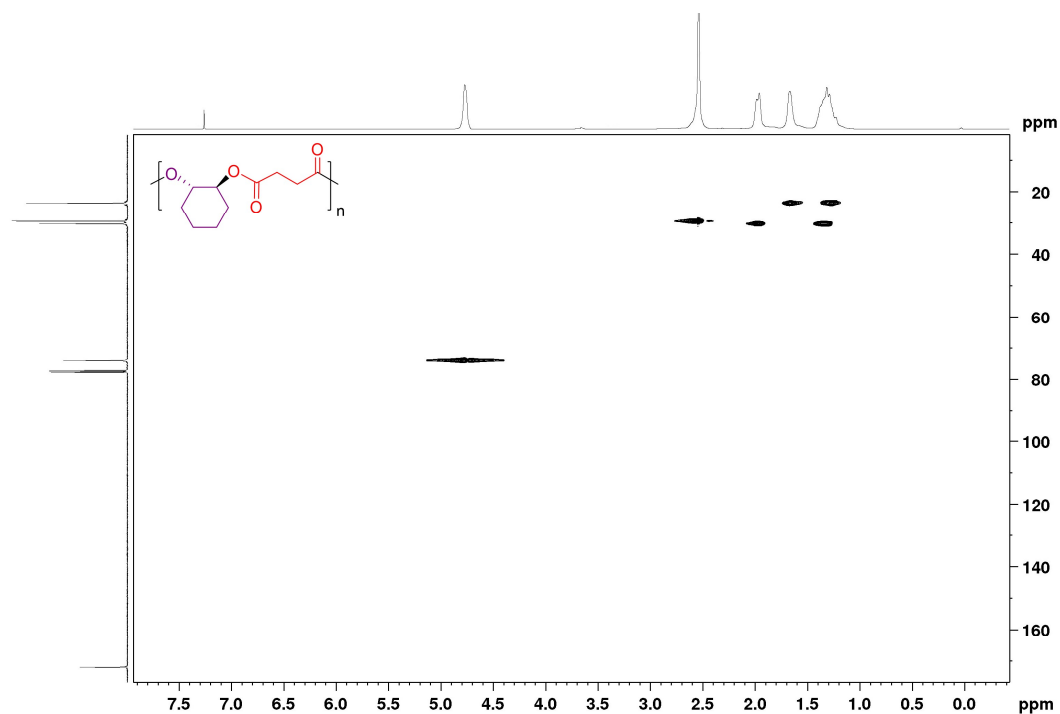

**Figure S44.** HSQC NMR spectrum of poly(cyclohexene succinate) copolymer in  $\text{CDCl}_3$  obtained by reaction of CHO, SA, and **1** in ratio  $[\text{CHO}]:[\text{SA}]:[\text{cat.}]:[\text{BnOH}] = 200:200:1:4$  at  $100^\circ\text{C}$  in toluene.

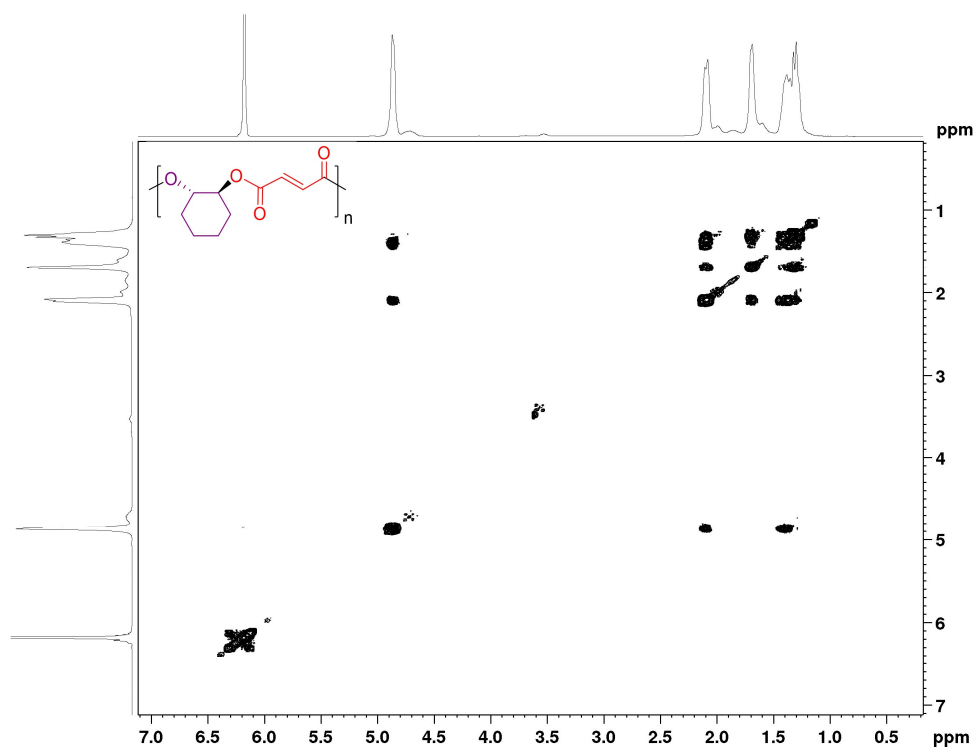

**Figure S45.** COSY NMR spectrum of poly(cyclohexene malonate) copolymer in  $\text{CDCl}_3$  obtained by reaction of CHO, SA, and **1** in ratio [CHO]:[ MA]:[cat.]:[BnOH] = 200:200:1:4 at 100 °C in toluene.

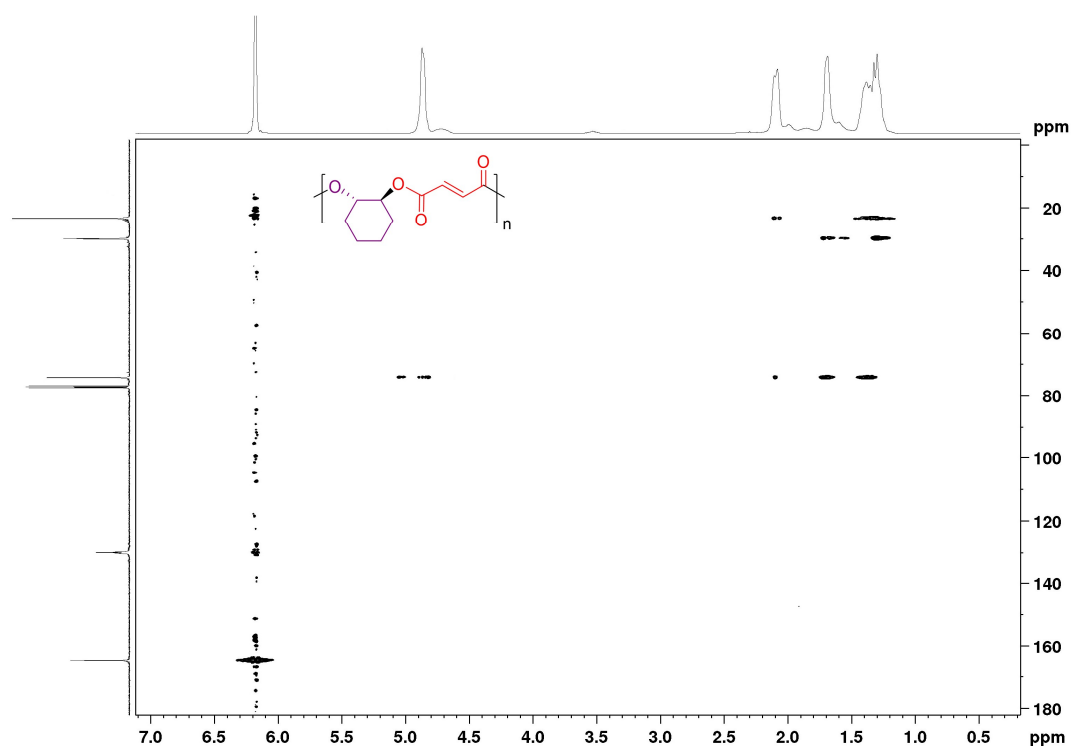

**Figure S46.** HMBC NMR spectrum of poly(cyclohexene malonate) copolymer in  $\text{CDCl}_3$  obtained by reaction of CHO, SA, and **1** in ratio [CHO]:[ MA]:[cat.]:[BnOH] = 200:200:1:4 at 100 °C in toluene.

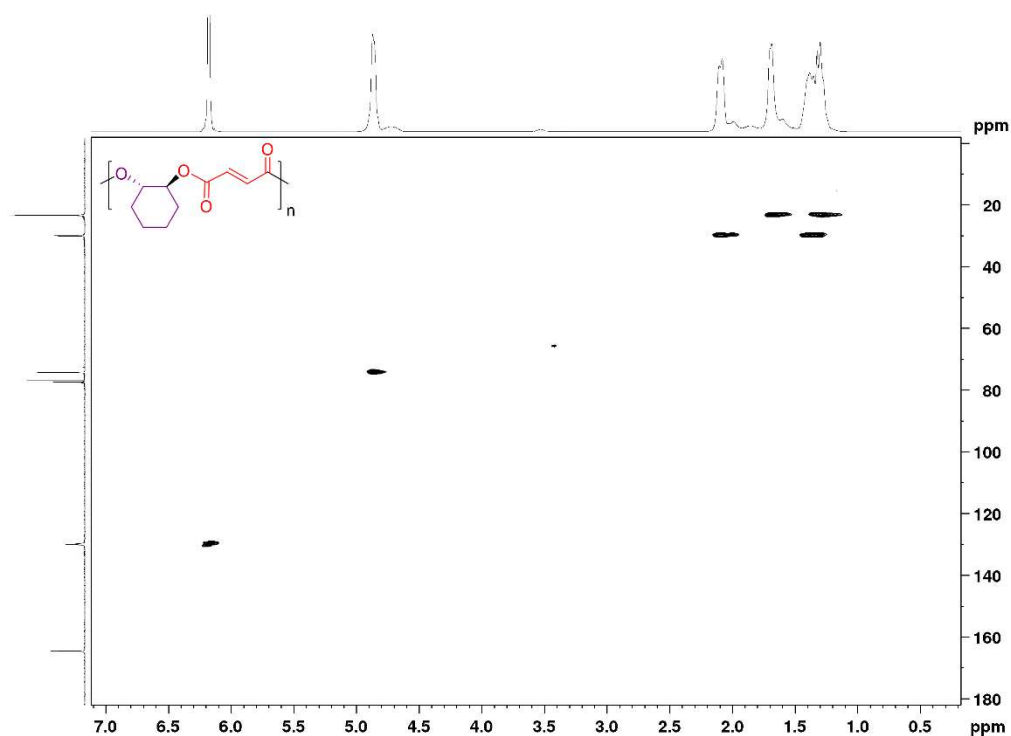

**Figure S47.** HSQC NMR spectrum of poly(cyclohexene malonate) copolymer in  $\text{CDCl}_3$  obtained by reaction of CHO, SA, and **1** in ratio  $[\text{CHO}]:[\text{MA}]:[\text{cat.}]:[\text{BnOH}] = 200:200:1:4$  at  $100^\circ\text{C}$  in toluene.

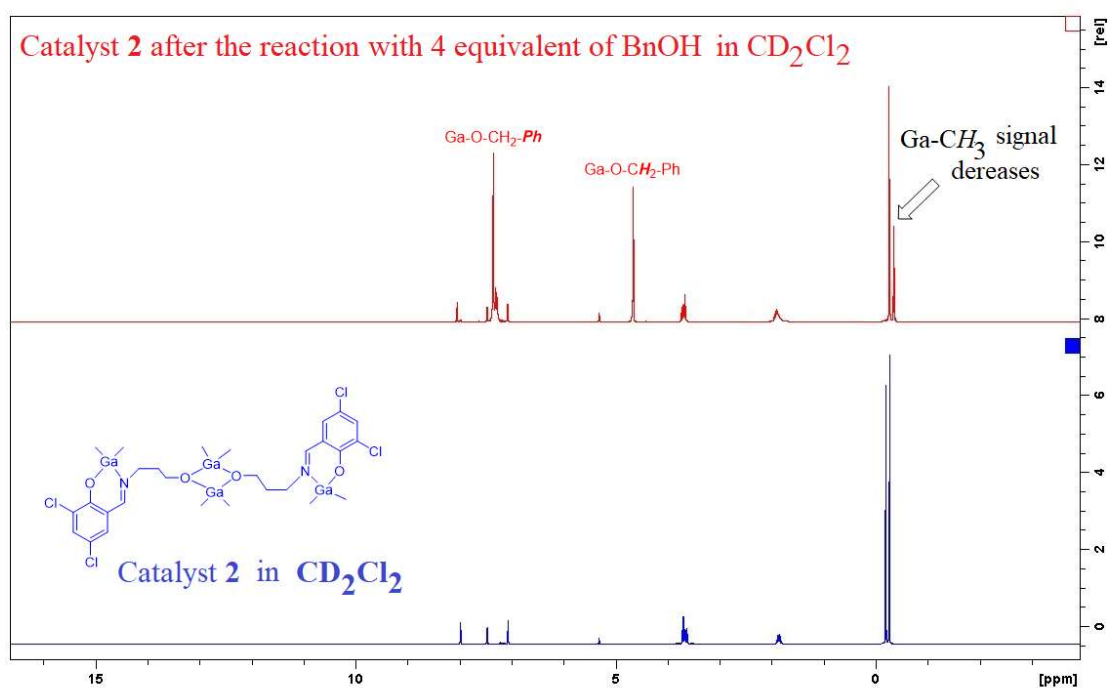

**Figure S48.**  $^1\text{H}$  NMR spectrum of **2** (blue color) and **catalyst-2-OBn** (red color) in  $\text{CD}_2\text{Cl}_2$ . **Catalyst-2-OBn** obtained by reaction of **catalyst-2** and BnOH in ratio  $[\text{Cat-2}]:[\text{BnOH}] = 1:4$  at  $23^\circ\text{C}$  in  $\text{CD}_2\text{Cl}_2$ .

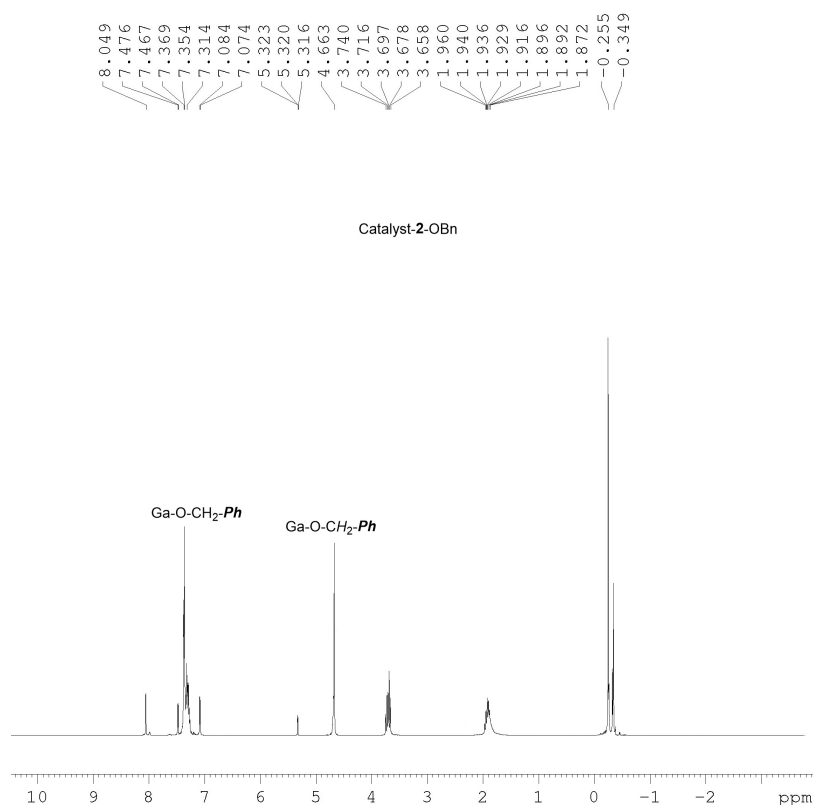

**Figure S49.** <sup>1</sup>H NMR spectrum **catalyst-2-OBn** in CD<sub>2</sub>Cl<sub>2</sub> obtained by reaction of **2** and BnOH in ratio [Cat-**2**]:[BnOH] = 1:4 at 23 °C in CD<sub>2</sub>Cl<sub>2</sub>.

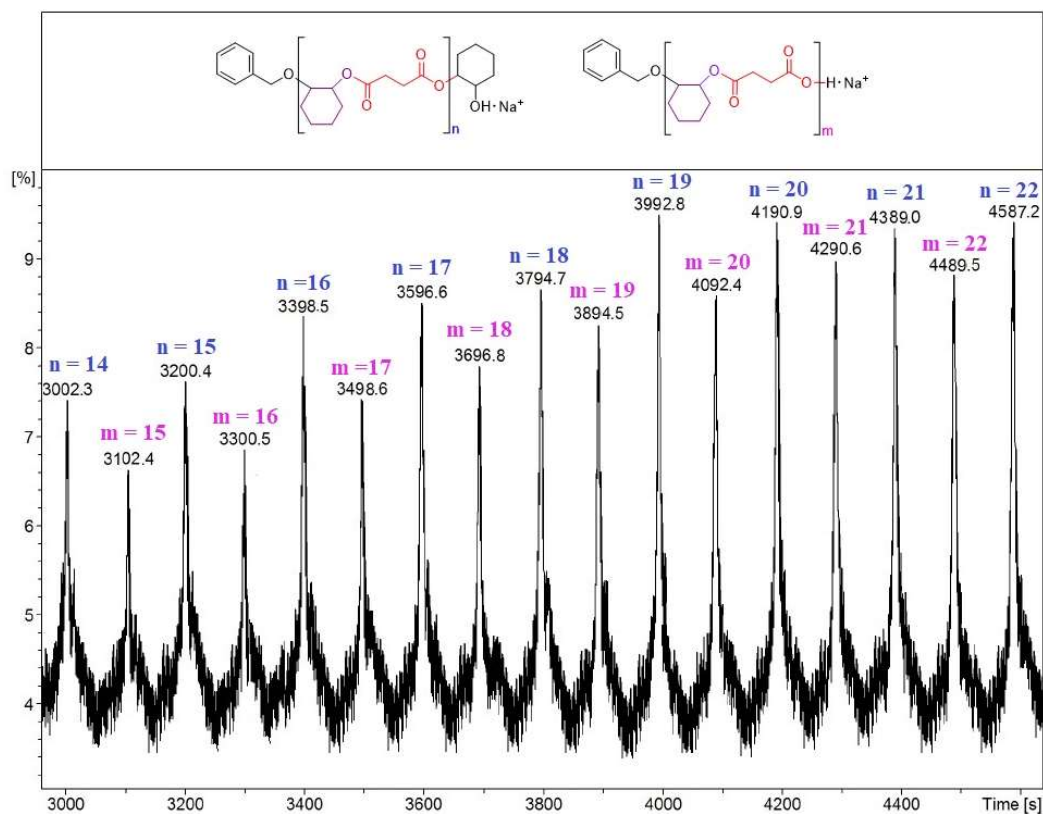

**Figure S50.** MALDI-ToF spectrum of poly(cyclohexene succinate) copolymer obtained by reaction of CHO, SA, and **1** in ratio [CHO]:[SA]:[cat.]:[BnOH] = 100:200:1:4 at 100 °C in toluene at 100 °C.

**Table S2** ROP of  $\epsilon$ -CL initiated by complex **1** with varying [monomer]:[cat.]:[BnOH] molar ratios in toluene at 100 °C.

| Entry          | [M]:[cat.]:[BnOH]                              | Time<br>min                           | Conv. <sup>a</sup><br>% | $M_n^{b(\text{theo})}$<br>Kg/mol         | $M_n^{\text{cal(GPC)c}}$<br>Kg/mol       | PDI                                       |
|----------------|------------------------------------------------|---------------------------------------|-------------------------|------------------------------------------|------------------------------------------|-------------------------------------------|
| 1              | 200:1:1                                        | 60                                    | 99                      | 22.7                                     | 22.1                                     | 1.12                                      |
| 2              | 200:1:4                                        | 15                                    | 98                      | 5.7                                      | 5.6                                      | 1.07                                      |
| 3              | 500:1:8                                        | 20                                    | 95                      | 6.9                                      | 6.3                                      | 1.10                                      |
| 4              | 1000:1:10                                      | 40                                    | 95                      | 10.9                                     | 10.2                                     | 1.13                                      |
| 5              | 5000:1:10                                      | 300                                   | 90                      | 51.47                                    | 49.4                                     | 1.16                                      |
| 6              | 10000:1:10                                     | 720                                   | 90                      | 102.8                                    | 100.3                                    | 1.18                                      |
| 7 <sup>d</sup> | (200 <sup>1st</sup> + 200 <sup>2nd</sup> ):1:4 | 15 <sup>1st</sup> + 10 <sup>2nd</sup> | 97                      | 5.7 <sup>1st</sup> , 11.1 <sup>2nd</sup> | 5.6 <sup>1st</sup> , 10.9 <sup>2nd</sup> | 1.07 <sup>1st</sup> , 1.09 <sup>2nd</sup> |

<sup>a</sup>Monomer conversion as determined by <sup>1</sup>H NMR analysis. <sup>b</sup> $M_n^{\text{theo}} = \{[M_w(\text{monomer}) \times [\text{Monomer}]/[\text{Cat}] \times \text{Conv.}/\text{number eq of BnOH}\} + M_n(\text{BnOH})$ . <sup>c</sup> $M_n^{\text{cal(GPC)}}$  values were determined by GPC analysis in THF using polystyrene standards. <sup>d</sup>Polymerization resumption experiment of  $\epsilon$ -CL in toluene at 100 °C, [monomer]:[cat.]:[BnOH] = (200<sup>1st</sup> + 200<sup>2nd</sup>):1:4.
